# Supplementary material
Source: PubMed Central journal article supplement (PMC4313863)
Supplement: pnas.1423628112.sapp.pdf [file pnas.1423628112.sapp.pdf]

## SUPPLEMENTARY INFORMATION APPENDIX

### The draft genome of Tibetan hulless barley reveals adaptive patterns to the high stressful

#### Tibetan Plateau

Xingquan Zeng<sup>a,b,1</sup>, Hai Long<sup>c,1</sup>, Zhuo Wang<sup>d,1</sup>, Shancen Zhao<sup>d,1</sup>, Yawei Tang<sup>a,b,1</sup>, Zhiyong Huang<sup>d,1</sup>, Yulin Wang<sup>a,b,1</sup>, Qijun Xu<sup>a,b</sup>, Likai Mao<sup>d</sup>, Guangbing Deng<sup>c</sup>, Xiaoming Yao<sup>d</sup>, Xiangfeng Li<sup>d,e</sup>, Lijun Bai<sup>d</sup>, Hongjun Yuan<sup>a,b</sup>, Zhifen Pan<sup>c</sup>, Renjian Liu<sup>a,b</sup>, Xin Chen<sup>c</sup>, QiMei Wang<sup>a,b</sup>, Ming Chen<sup>d</sup>, Lili Yu<sup>d</sup>, Junjun Liang<sup>c</sup>, DaWa DunZhu<sup>a,b</sup>, Yuan Zheng<sup>d</sup>, Shuiyang Yu<sup>c</sup>, ZhaXi Luo<sup>a,b</sup>, Xuanmin Guang<sup>d</sup>, Jiang Li<sup>d</sup>, Cao Deng<sup>d</sup>, Wushu Hu<sup>d</sup>, Chunhai Chen<sup>d</sup>, XiongNu TaBa<sup>a,b</sup>, Liyun Gao<sup>a,b</sup>, Xiaodan Lv<sup>d</sup>, Yuval Ben Abu<sup>f</sup>, Xiaodong Fang<sup>d</sup>, Eviatar Nevo<sup>g,2</sup>, Maoqun Yu<sup>c,2</sup>, Jun Wang<sup>h,i,j,2</sup>, Nyima Tashi<sup>a,b,2</sup>

<sup>a</sup>Tibet Academy of Agricultural and Animal Husbandry Sciences, Lhasa, Tibet 850002, China;

<sup>b</sup>Barley Improvement and Yak Breeding Key Laboratory of Tibet Autonomous Region, Lhasa 850002, China; <sup>c</sup>Chengdu Institute of Biology, Chinese Academy of Sciences, Chengdu 610041, P. R. China; <sup>d</sup>BGI-Tech, BGI-Shenzhen, Shenzhen 518083, China; <sup>e</sup>College of Life Science, University of Chinese Academy of Sciences, Beijing 100049, China; <sup>f</sup>Projects and Physics Section, Sapir Academic College, D.N. Hof Ashkelon 79165, Israel; <sup>g</sup>Institute of Evolution, University of Haifa, Mount Carmel, Haifa 31905, Israel; <sup>h</sup>BGI-Shenzhen, Shenzhen 518083, China; <sup>i</sup>Department of Biology, University of Copenhagen, Copenhagen 2200, Denmark; <sup>j</sup>Princess Al Jawhara Center of Excellence in the Research of Hereditary Disorders, King Abdulaziz University, Jeddah 21441, Saudi Arabia

<sup>1</sup>These authors contributed equally to this work.

<sup>2</sup>To whom correspondence should be addressed.

Email: Nyima Tashi, [nima\\_zhaxi@sina.com](mailto:nima_zhaxi@sina.com); Jun Wang, [wangj@genomics.org.cn](mailto:wangj@genomics.org.cn); Maoqun Yu, [yumaoqun@cib.ac.cn](mailto:yumaoqun@cib.ac.cn); or Eviatar Nevo, [nevo@research.haifa.ac.il](mailto:nevo@research.haifa.ac.il).

## Supplementary Information

### CONTENTS

|                                                                                                       |    |
|-------------------------------------------------------------------------------------------------------|----|
| I. Note .....                                                                                         | 3  |
| 1 Genome sequencing, assembly and quality assessment .....                                            | 3  |
| 1.1 Whole genome shot-gun sequencing using Illumina technology .....                                  | 3  |
| 1.2 De novo assembly of the Tibetan hulless barley genome.....                                        | 3  |
| 1.3 Evaluation of sequencing depth and GC-depth distribution on the quality of genome assemblies..... | 5  |
| 1.4 Unassembled genome evaluation .....                                                               | 5  |
| 1.5 Quality evaluation of the genome assembly .....                                                   | 5  |
| 1.6 Reconstruct chromosomes based on the barley genetic map.....                                      | 6  |
| 2 Genome annotation.....                                                                              | 7  |
| 2.1 Repeat annotation .....                                                                           | 7  |
| 2.2 Gene model prediction and functional annotation.....                                              | 7  |
| 2.3 Gene function annotation.....                                                                     | 9  |
| 3 Comparison with the cultivated barley genome .....                                                  | 9  |
| 3.1 Orthologous identification.....                                                                   | 9  |
| 3.2 Mapping cultivars and wild barleys to the Tibetan hulless barley genome.....                      | 9  |
| 3.3 Aligning the genome sequences of the Tibetan hulless barley and Morex barley.....                 | 9  |
| 4 Genome evolution .....                                                                              | 10 |
| 4.1 Identification of orthologous genes .....                                                         | 10 |
| 4.2 Phylogenetic analysis .....                                                                       | 10 |
| 4.3 Genome synteny and whole genome duplication analysis .....                                        | 11 |
| 4.4 Gene family expansion and contraction .....                                                       | 12 |
| 4.5 Positively selected gene identification .....                                                     | 13 |
| 5 Genetic diversity in landrace and wild progenitor.....                                              | 13 |
| 5.1 Re-sequencing ten cultivars and wild barleys .....                                                | 13 |
| 5.2 Individual SNP and InDel calling.....                                                             | 14 |
| 5.3 Population re-sequencing analysis.....                                                            | 14 |
| 5.4 Selective sweep analysis.....                                                                     | 14 |
| 5.5 Correlation analysis .....                                                                        | 15 |
| 6 References .....                                                                                    | 16 |
| II. Tables.....                                                                                       | 18 |
| III. Figures.....                                                                                     | 54 |

## I. Note

### 1 Genome sequencing, assembly and quality assessment

#### 1.1 Whole genome shot-gun sequencing using Illumina technology

Genomic DNA was isolated from an individual of *H. vulgare* L. var. *nudum*, also known as “Qingke” in Chinese and “Ne” in Tibetan, and a landrace of Tibetan hulless barley *Lasa Goumang* (**Fig. S1**). For each short-insert size library, about 5 µg of DNA was fragmented, end-repaired, ligated to Illumina paired-end adapters, size selected at 250,500 and 800 base pairs (bp) on agarose gels, PCR amplified, linked to vector to yield short-insert size libraries. For each large-insert size mate-pair library, 20–60 µg of genomic DNA was sheared to the desired insert size using nebulization for 2 kilobases (kb) or HydroShear for 5 kb, 10 kb, 20 kb and 40 kb. DNA fragments were biotin-labeled, size selected, and circularized. Circular DNA molecules were sheared with Adaptive Focused Acoustic (Covaris) to an average size of 500 bp. Biotinylated fragments were purified on magnetic beads (Invitrogen) and used to construct libraries. All libraries were sequenced on the Illumina sequencing platform. Details of the data amount are shown in **Table S1**.

We performed a stringent filtering process on raw reads before the subsequent analysis as follows: (1) remove reads containing more than 2% Ns or with poly-A structure; (2) remove reads containing 40% or more low-quality bases for short-insert size libraries, and 60% for large-insert size libraries; (3) remove adapter-polluted reads; (4) remove reads with overlap between read1 and read2; (5) remove PCR-duplicated reads. The statistics of high-quality sequencing data are shown in **Table S2**.

#### 1.2 De novo assembly of the Tibetan hulless barley genome

The 17-mer analysis using 133 Gb of high-quality sequencing data indicated that the peak frequency of K\_depth was about 26. Therefore, the estimated genome size of Tibetan hulless barley was calculated as 4.48 Gb (**Fig. S2**). Additional K-mer analysis (from 19-mer to 31-mer)

showed similar estimated genome size from 4.33 to 4.5 Gb (**Table S3**). A K-mer refers to an artificial oligo nucleotide sequence with length K. A sequencing read with L bases contains (L-K+1) K-mers. The frequency of each K-mer follows a Poisson distribution in a given data set except for a high proportion of low frequency K-mers due to sequencing errors. The genome size G is estimated as  $G = K\_num/K\_depth$ , where K\_num is the total number of K-mers, and K\_depth is the expected K-mer frequency, which is the peak value of Poisson distribution of K-mer frequencies.

Reads generated by Solexa pipeline have a low proportion of error, while *SOAPdenovo* (1, 2) is sensitive to sequencing error. Clean data of short-insert sizes (<1 kb) need to be corrected; however, there is no need for large-insert size sequencing data. Sequencing error will lead to low frequency K-mers, so we built a K-mer frequency table and set a cutoff for dividing low and high frequency K-mers. We corrected the error bases by changing the site of the error base to the other base in order to form high frequency K-mers.

The WGS assembly was conducted by *SOAPdenovo* (1, 2) with the K-mer parameter set to 67. The genome assembly procedure was as follows: (1) Constructed contig: split the short-insert size corrected reads into K-mers, constructed de Bruijn graph, simplified the graph and solved the K-mer path to get the contigs; (2) Constructed scaffold: aligned both short-insert and large-insert size reads onto the contigs, used paired-end relationships to construct the scaffolds. *SSPACE-V1.1* (3) was used to further construct scaffold by PE relationships; (3) Filled gap: retrieved the read pairs mapped to the local region around gaps then carried out a local assembly to fill the gaps.

The resulting assembly totaled 4.59 Gb with a contig N50 of 14 kb and a scaffold N50 of 190 kb. The distribution of scaffold lengths identified many short scaffolds less than 200 bp. We assumed that the sequences <200 bp were caused by sequencing errors, or were difficult regions to assemble. We discarded these sequences to obtain the final genome assembly, of which total

scaffold length was 3.89 Gb, total contig length was 3.64 Gb, contig N50 size was 18.07 kb, and scaffold N50 size was 242 kb (**Table S4**).

### **1.3 Evaluation of sequencing depth and GC-depth distribution on the quality of genome assemblies**

We calculated the sequencing depth distribution for bases, which shows no more than 2% of the bases have a depth of less than 10 (**Fig. S3a**). Also, we used 10 kb non-overlapping sliding windows and calculated the GC content and average depth among the windows. The filtered reads were aligned onto the assembly genome sequence using *SOAP*. The percentages of bases with different depth frequencies in genomes were calculated (**Fig. S4a**). The GC content distribution of *H. vulgare* is also similar to that of *O. sativa* (**Fig. S4b**).

### **1.4 Unassembled genome evaluation**

We discarded sequences with lengths <200 bp in the assembly results. For the assembled scaffolds in genome sequences with lengths <200 bp, we found that many were repeats and most had a sequencing depth much less than the average sequencing depth, and the peak depth ranged from 20 to 29 (**Fig. S3b**), which suggests that these short assembly sequences with lengths <200 bp are low quality.

We investigated the unmapped reads by aligning the clean data to the assembled genome sequences with *SOAPaligner*. Many of the unmapped reads could be aligned to the genome with megablast and were located in repeat regions of the genome. This may indicate that the unmapped reads exist partly due to the high repeat content in the genome.

## **1.5 Quality evaluation of the genome assembly**

### **1.5.1 BAC evaluation**

The published BAC clone sequences of *H. vulgare* L. cv. Morex were considered reference data. We mapped the assembled genome sequence back to the BAC sequences (*BlastN* -e 1e-5, nucleotide identity >0.97) to check the coverage rate and quality for the assembled genome

sequences. The aligning segments not in synteny blocks were detected and filtered by our in-house pipeline (**Fig. S5 and Table S5**). *H. vulgare* scaffolds covered 90.63–97.80% of the BAC sequences with an average identity of 98.83%. The regions that could not be covered were full of repetitive sequences.

### **1.5.2 Gene coverage evaluation**

The clean reads of transcriptome data from three samples were de novo assembled with Trinity (4) (**Table S6**), and the resulting unigene (EST) sequences became the query file, mapped to the assembled genome sequence with a threshold of e-value  $<1e-5$  and identity  $>0.99$  to check the gene region coverage rate of the assembly (**Table S7**). The number of RNA sequences that can be covered by genome scaffolds, and the number of RNA sequences with  $>90\%$  (or  $>50\%$ ) in one scaffold were calculated.

### **1.6 Reconstruct chromosomes based on the barley genetic map**

Integrated anchoring data sets generated by The International Barley Genome Sequencing Consortium were obtained via FTP download from: [ftp://ftpmips.helmholtz-muenchen.de/plants/barley/public\\_data/anchoring/](ftp://ftpmips.helmholtz-muenchen.de/plants/barley/public_data/anchoring/).

This released version of the barley genetic/physical map is composed of various anchoring strategies, and the first two strategies (AC1: FPC\_PSEUDO\_ANCHORED\_280512\_AC1.FA and AC2: WGS\_ANCHORED\_280512\_AC2.FA) were used as a reference to assign the assembled scaffolds to chromosomes. From these data sets, which created the contig sequences with genetic markers, we can easily assign the assembled scaffold to a particular chromosome according to the sequence homology to the aforementioned anchoring contigs (AC). Sequence alignments of the WGS scaffold against AC data were performed using *BlastN* (minimal sequence hit length of  $\geq 200$  bp, e-value  $<1.0 \times 10^{-5}$ , at least 99% identity to AC data) and the best-scoring match was chosen in cases of multiple matches. We anchored 28,374 scaffolds onto seven chromosomes, with a total size of 3.48 G (about 89.34% of the total assembled genome) (**Tables S8–9**).

## 2 Genome annotation

### 2.1 Repeat annotation

We identified repetitive elements using a combination of *Repbase*-based and de novo approaches.

We used Tandem Repeats Finder (TRF) (5) to search for tandem repeats (**Tables S10–12**).

#### 2.1.1 De novo identification of repeat sequences

First, de novo prediction programs *RepeatModeler* (6) and *LTR-FINDER* (7) were employed to build the de novo repeat library based on the genome, then contamination and multi-copy genes in the library were removed. *LTR-FINDER* was used to search the whole genome for the characteristic structure of the full-length long terminal repeat retrotransposons (LTR) (its ~18 bp sequence was complementary to the 3' tail of some tRNA), and then our in-house pipeline was used to filter the low-quality and falsely predicted LTRs. Using this library as a database, *RepeatMasker* was run to find and classify the repeats.

#### 2.1.2 Employment of Repbase for repeat identification

The homology-based approach involves alignment with *Repbase* (8) which contains many known repeats, identified from corresponding software such as: *RepeatMasker* and *RepeatProteinMask*, which identify TEs at the DNA and protein level, respectively.

#### 2.1.3 Sequence divergence of TEs

The transposable elements were identified and the sequence divergence was computed by *RepeatMasker* compared to TE libraries. The extent of divergence shows whether the TE repeats were recently produced or anciently produced by transposition. We found that the de novo method could identify more recently-active TE repeats than ancient TEs (**Fig. S6**).

### 2.2 Gene model prediction and functional annotation

Protein-coding genes were predicted by homolog-based and de novo methods, in combination with the transcriptome sequencing data.

#### 1) De novo prediction

De novo gene prediction was performed on the repeat-masked genome. *AUGUSTUS* (9) and *GENSCAN* (10) were applied.

#### 2) Homolog-based prediction

Homologous proteins of other species (*A. thaliana*, *B. distachyon*, *O. sativa*, *S. bicolor*, and *Z. mays*) were mapped to the *H. vulgare* genome using *TBlastN* (11) with an e-value cutoff of  $1e^{-5}$  and a protein similarity cutoff of 50%. The aligned genome sequences and the query proteins were then passed to *GeneWise* (12) to search for accurate spliced gene model structures.

#### 3) RNA-Seq based prediction

Three samples of hulless barley landrace *Lasa Goumang*, namely, G2, S1, and Y2 as well as the full length cDNA of cultivated barleys (HvuFLcDNA\_rep and HvuFLcDNA23614), were subjected to transcriptome sequencing for evaluation of genome assembly quality and complement of gene prediction, of which, G2 comprised mixed root tissues from 10-day seedlings and mature plants; Y2 comprised mixed leaf samples and stems from same plants of G2; Y2 were young spikes of about 2 cm and 5 cm (**Table S13**).

RNA-Seq method can solve the problem of alternative splicing at one gene locus (13). Transcriptome reads were aligned against the genome using *TopHat* (14) to identify candidate exon regions and splicing sites. *Cufflinks* (14) was performed to assemble the alignments into transcripts. ORFs were predicted on the transcripts by using an HMM-based training parameter.

#### 4) Integration evidence



Gene model evidence generated from the above three methods were integrated by *GLEAN* (15) to produce a consensus gene-set (**Table S14–15**). The final gene set had similar gene length, CDS length, exon length and intron length distribution compared to other plant species (**Fig. S7; Table S16**). 93.9% (33,928) genes, which could be linked to chromosomes (**Table S17**).

### **2.3 Gene function annotation**

Gene functions were assigned according to the best match of the alignments using *BlastP* to *SwissProt* and *TrEMBL* databases (16). The motifs and domains of genes were determined by *InterProScan* (17) against protein databases such as *ProDom*, *PRINTS*, *Pfam*, *SMART*, *PANTHER*, and *PROSITE*. Gene Ontology (18) IDs for each gene were obtained from the corresponding *InterPro* entries. All genes were aligned against *KEGG* (19) proteins, and the pathway in which the gene might be involved was derived from the matched genes in *KEGG* (**Table S18**).

## **3 Comparison with the cultivated barley genome**

### **3.1 Orthologous identification**

We aligned the gene set of Tibetan hulless barley and 26,159 high-confidence gene sets of the published Morex genome (20) using *BlastP*. Reciprocal best hits were identified with the threshold of  $e\text{-value} < 1e-5$  and protein identity  $> 60\%$ . A total of 22,673 orthologous genes were identified (**Fig. S8**).

### **3.2 Mapping cultivars and wild barleys to the Tibetan hulless barley genome**

Ten accessions of wild and cultivated Tibetan hulless barleys as well as six published barleys (20) were selected. The DNA sequencing data were aligned to the reference genome of Tibetan hulless barley. To reduce the complexity of the Tibetan hulless barley genome and to acquire a high-quality mapping result, we only retained the scaffolds and contigs that were anchored to the seven linkage groups and the contigs with lengths  $> 200$  bp as the reference genome (**Table S19**).

### **3.3 Aligning the genome sequences of the Tibetan hulless barley and Morex barley**

*BlastN* was used to align the genome sequences of the Morex barley to the Tibetan hulless barley genome with the e-value cut off at 1e-5. Next, the in-house pipeline was used to further filter the aligning result. The homologous sequences and specific sequences of Tibetan hulless barley and Morex barley could then be detected (**Table S20-21**).

## 4 Genome evolution

### 4.1 Identification of orthologous genes

We identified gene families with OrthoMCL (21) methods based on the all-versus-all *BlastP* alignment of protein sequences from 13 species (*H. vulgare*, *B. distachyon*, *O. sativa*, *S. bicolor*, *Z. mays*, *A. thaliana*, *C. papaya*, *S. italic*, *V. vinifera*, *P. heterocycla*, *T. urartu*, *Ae. Tauschii*, and *T. aestivum*) with e-values less than 1e-5. Barley-specific genes were determined by combining genes in barley-specific families and unclustered barley genes (**Fig. S9; Tables S22–23**).

*B. distachyon*, <ftp://ftpmips.helmholtz-muenchen.de/plants/brachypodium/v1.2>

*O. sativa*, IRGSP1.0, <http://rapdb.dna.affrc.go.jp/download/irgsp1.html>

*S. bicolor*, [ftp://ftp.jgi-psf.org/pub/JGI\\_data/phytozome/v7.0/Sbicolor/annotation/](ftp://ftp.jgi-psf.org/pub/JGI_data/phytozome/v7.0/Sbicolor/annotation/)

*Z. mays*, ZmB73\_5a, <http://ftp.maizesequence.org/release-5a/working-set/>

*A. thaliana*, [ftp://ftp.arabidopsis.org/home/tair/Genes/TAIR10\\_genome\\_release/](ftp://ftp.arabidopsis.org/home/tair/Genes/TAIR10_genome_release/)

*C. papaya*, <ftp://asgpb.mhpcc.hawaii.edu/papaya/annotation>

*S. italic*, [ftp://ftp.genomics.org.cn/pub/Foxtail\\_millet/gene\\_annotation/V](ftp://ftp.genomics.org.cn/pub/Foxtail_millet/gene_annotation/V).

*vinifera*, [www.genoscope.cns.fr/externe/Download/Projets/Projet\\_ML/data/12X/annotation/](http://www.genoscope.cns.fr/externe/Download/Projets/Projet_ML/data/12X/annotation/)

*T. aestivum*,

[https://urgi.versailles.inra.fr/download/iwgsc/Gene\\_models/survey\\_sequence\\_gene\\_models\\_MIPS\\_v2.2\\_Jul2014.zip](https://urgi.versailles.inra.fr/download/iwgsc/Gene_models/survey_sequence_gene_models_MIPS_v2.2_Jul2014.zip)

### 4.2 Phylogenetic analysis

#### 4.2.1 Species tree construction

We identified 153 single-copy orthologous genes in the previous step and used them to build a phylogenetic tree for species including *H. vulgare*, *B. distachyon*, *O. sativa*, *S. bicolor*, *Z. mays*, *A. thaliana*, *C. papaya*, *S. italic*, *V. vinifera*, *P. heterocycla*, *T. urartu*, *Ae. Tauschii*, and *T. aestivum*.

We aligned CDS sequences from each single-copy family guided by *MUSCLE* (22) alignments of protein sequences, and then concatenated the aligned CDS to one super gene for each species. We extracted 4D sites from the CDS sequences and reconstructed the phylogenetic tree using *PhyML* (23, 24) under the GTR+gamma model. We used aLRT values to assess branch reliability (**Fig. S10a**).

#### **4.2.2 Divergence time estimation**

We took the same set of 4D sequences to estimate divergence times. Fossil calibration times were set, as presented in **Table S24**. We used the PAML mcmctree program (PAML version 4.5) (25) to determine split times using the approximate likelihood calculation method and the “Correlated molecular clock” and “REV” substitution models. The shape and scale parameters were set according to the substitution rate per time unit computed by PAML basem (25). The alpha parameter was also set, as computed by PAML baseml. The MCMC process of PAML mcmctree was set to sample 200,000 times with the sample frequency set to 2 after a burn-in of 40,000 iterations. The fine-tuned parameter  $r$  was set to make the acceptance proportions fall in the interval (20%, 40%). The other parameters were set at the default values.

When the multidivtime program was used to calculate split time, the MCMC chain was run for 40,000 generations as burn-in and approximately 400,000 generations to calculate posterior distributions. Other parameters were set as suggested in the manual. For r8s, the maximum likelihood trees inferred by PhyML (with branch lengths) were used as input to calculate split times in the global molecular clock with default settings. Tracer (v1.5.0) (26) was applied to check convergence, and two independent runs were performed to confirm convergence (**Fig. S10b**).

#### **4.3 Genome synteny and whole genome duplication analysis**

Genome synteny between Tibetan hulless barley and other species were analyzed based on syntenic blocks. All-versus-all *BlastP* (e-value less than  $1e^{-5}$ ) was used to detect orthologous

genes between species. Then, syntenic blocks were detected using Mcscan (27, 28) (**Table S25; Figs. S11–15**). The 4DTv values (29) (deviation at the 4-fold degenerate third codon position) of the blocks were calculated and revised in the HKY model. 4DTv distribution was used to analyze whether whole genome duplication (WGD) events occurred.

Among the *H. vulgare* L. var. *nudum*, *B. distachyon*, and *O. sativa* genomes, chromosomes 1H, 3H of *H. vulgare*, Bd2 of *B. distachyon* and Os5, Os10, Os1 of *O. sativa* have collinear relationships, while 2H is collinear to Bd5, Os7, Os4; 4H is collinear to Bd1, Os3; 5H is collinear to Bd4, Os8, Os9, Os12; 6H and 7H is collinear to Bd3, Os6, Os11 (**Figs. S11, S14**). Similar collinearity was found between *H. vulgare*–*S. bicolor* and *H. vulgare*–*S. italica* genomes (**Figs. S12, S14**). These results are similar to a previous report (30), which provides a more detailed view of genome collinearity among Poaceae species.

Chromosome rearrangement exists extensively in grass genomes and evolved from the reconstructed Poaceae ancestral genome containing five chromosomes, intermediated by the 12 chromosome ancestor (31). Since *O. sativa* retained 12 chromosomes, we used it as the reference to investigate the evolutionary pattern of *H. vulgare* chromosomes. The collinear relationship between *H. vulgare* and *O. sativa* chromosomes is evidence that at least four major nested chromosome fusions (NCF) occurred in *H. vulgare* from the intermediate ancestor. The 1H of *H. vulgare* originated from ancestral chromosomes 10 and 5, while 2H came from ancestral chromosome 7 and 4. 1H and 2H each contain one nested insertion to the centromeric region to form the *H. vulgare* chromosomes. And the two NCFs in 5H of *H. vulgare* originated from ancestral chromosomes 3, 9, and 12. There are also two minor syntenic disruptions presented in 4H and 7H of the *H. vulgare* genome. (**Fig. S15**)

#### **4.4 Gene family expansion and contraction**

We used *CAFÉ* (32) software to study gene gain and loss across the phylogenetic tree of 12 species under a random birth and death model. The  $\lambda$  (lambda) parameter, which described both gene birth

( $\lambda$ ) and death ( $\mu = -\lambda$ ) rate across all branches, was estimated to be 0.00771358 using maximum likelihood. For families with conditional P-values less than the threshold (0.05), we also computed Viterbi P-values for each branch. The expanded and contracted gene family numbers in *H. vulgare* were 2,185 and 5,631, respectively (**Fig. S16; Table S26**). The *H. vulgare* significantly expanded gene families were enriched in the functions of gene regulation and stress resistance (**Table S27**). Cold-related gene and AP2/TF families were expanded in the Tibetan hulless barley lineage (**Table S28**).

#### 4.5 Positively selected gene identification

We calculated pairwise Ka, Ks between *H. vulgare* L. var. *nudum* and *H. vulgare* L. cv. Morex, *B. distachyon*, *O. sativa*, *A. tauschii*, *T. urartu* by KaKs\_Calculator (33). The Ka/Ks dot chart was then drawn for orthologous gene pairs of species. From the Ka-versus-Ks figure, the evolutionary process of Tibetan hulless barley diverging from Morex barley had more positively selected genes (Ka/Ks >1) than the other species (**Fig. S17**). KEGG pathway analysis indicated that many of the positively selected genes are involved in pathways related to environmental responses and adaptation (**Table S29**).

## 5 Genetic diversity in landrace and wild progenitor

### 5.1 Re-sequencing ten cultivars and wild barleys

We selected ten accessions to investigate diversity in the barleys. Of these lines, five are considered cultivated and five are wild barleys (**Table S30**). Re-sequencing the ten barley genotypes yielded 7.12 G 90-bp paired-end reads, which comprised 641.12 Gb of high-quality clean data, with a sequencing depth of more than 15X for each line. To reduce the complexity of the Tibetan hulless barley genome and to acquire a high-quality mapping result, we only retained the scaffolds and contigs that were anchored to the seven linkage groups and the contigs with lengths >200 bp as the reference genomes.

## 5.2 Individual SNP and InDel calling

The clean reads (the reads with deleted adapter and low-quality reads removed (quality value  $\leq 5$  (E) is  $\geq 50\%$  of the reads) were mapped in the reference genome using BWA software (34). The detailed parameters were as follows: “bwa aln -m 10000 -o 1 -e 10 -i 15 -L -I -t 4 -n 0.04” and “bwa sampe -a 800”. Due to the high content of repeats in the Tibetan hulless barley genome, some short reads (90 bp) had multiple hits in the reference genome. We only kept reads with mapping quality  $\geq 20$  for further analysis. The alignment results were merged and indexed as BAM files with potential PCR duplicates removed using the *SAMtools* package (34).

We used the Genome Analysis Toolkit (GATK) (35) that uses a realignment algorithm to minimize the number of mismatched bases across all reads for the SNP and InDel calling. The raw SNP or InDel calling results were filtered based on the following criteria: 1) Confidence score of SNP or InDel calling  $> 50$ , 2) Minimum number of required reads supporting each SNP or InDel  $\geq 3$ , 3) Distance of SNPs or InDels must be at least 5 bp from each other, and 4) The threshold of SNPs calling was set to 20 for base quality (**Table S31**).

## 5.3 Population re-sequencing analysis

To get SNPs and InDels in a population with ten accessions, the individual realignment results were used by GATK. The final SNPs or InDels dataset in the population was selected and then filtered under the following requirements: 1) Confidence score of SNP or InDel calling  $\geq 50$ ; 2) Base quality  $> 20$ ; 3) Total depth between 30X and 272X retained, and 4) Reads supporting each individual SNP or InDel should be  $\geq 3$  (**Table S32**). R version 2.15.0 and EIGENSOFT version 3.0 (36) were used in the principal component analysis (PCA). FRAPPE version 1.1 (37) was used in the population structure analysis (**Figs. S18–20**).

## 5.4 Selective sweep analysis

To investigate the genome regions under selective sweeps due to the plateau environment, re-sequencing samples were classified into two different groups: the plateau group (wild and cultivated Tibetan hulless barleys) and the non-plateau group (cultivated barley). We used Tajima's D (test to distinguish between a DNA sequence evolving randomly and one evolving under a non-random process (38)) and  $F_{st}$  (measure of genetic differentiation between two groups (39)) in every 50 kb genome window to measure whether some regions were under selective sweep. Genome regions with  $F_{st} > 0.5$  (or 5% top  $F_{st}$  windows) between the two groups and Tajima's D  $< -2$  within the plateau group were considered under selective sweeps (**Tables S33-35, Fig. S21**).

### **5.5 Correlation analysis**

The graph in **Fig. 3d** shows correlations between environmental stress variables that appear in groups B1-B10 and randomly selected genes from **Table S34 (Table S36)**. The environmental stress variables include salinity, oxygen, (low and high), solar radiation, CO<sub>2</sub>, drought, temperature (low and high), day length (short and long), and dormancy. This correlation, which was done by Matlab software(40), used algorithms that take each of the genes found in **Table S34** and correlated them to environmental stress variables, which were described above and were found in wheat and barley. If the effect is direct, the correlation value is high; if the correlation is indirect, the value is lower (41, 42).

## 6 References

1. Li R, *et al.* (2010) The sequence and *de novo* assembly of the giant panda genome. *Nature* 463(7279):311-317.
2. Li R, *et al.* (2010) *De novo* assembly of human genomes with massively parallel short read sequencing. *Genome Res* 20(2):265-272.
3. Boetzer M, Henkel CV, Jansen HJ, Butler D, & Pirovano W (2011) Scaffolding pre-assembled contigs using SSPACE. *Bioinformatics* 27(4):578-579.
4. Grabherr MG, *et al.* (2011) Full-length transcriptome assembly from RNA-Seq data without a reference genome. *Nat Biotechnol* 29(7):644-652.
5. Benson G (1999) Tandem repeats finder: a program to analyze DNA sequences. *Nucleic Acids Res* 27(2):573-580.
6. Smit, A.F.A. & Hubley, R. (2004), RepeatModeler. <http://www.repeatmasker.org>.
7. Xu Z & Wang H (2007) LTR\_FINDER: an efficient tool for the prediction of full-length LTR retrotransposons. *Nucleic Acids Res* 35(Web Server issue):W265-268.
8. Jurka J, *et al.* (2005) Repbase Update, a database of eukaryotic repetitive elements. *Cytogenet Genome Res* 110(1-4):462-467.
9. Stanke M, *et al.* (2006) AUGUSTUS: ab initio prediction of alternative transcripts. *Nucleic Acids Res* 34(Web Server issue):W435-439.
10. Burge C & Karlin S (1997) Prediction of complete gene structures in human genomic DNA. *J Mol Biol* 268(1):78-94.
11. Altschul SF, *et al.* (1997) Gapped BLAST and PSI-BLAST: a new generation of protein database search programs. *Nucleic Acids Res* 25(17):3389-3402.
12. Birney E, Clamp M, & Durbin R (2004) GeneWise and Genomewise. *Genome Res* 14(5):988-995.
13. Trapnell C, *et al.* (2010) Transcript assembly and quantification by RNA-Seq reveals unannotated transcripts and isoform switching during cell differentiation. *Nat Biotechnol* 28(5):511-515.
14. Trapnell C, *et al.* (2010) Transcript assembly and quantification by RNA-Seq reveals unannotated transcripts and isoform switching during cell differentiation. *Nature biotechnology* 28(5):511-515.
15. Elsik CG, *et al.* (2007) Creating a honey bee consensus gene set. *Genome Biol* 8(1):R13.
16. Bairoch A & Apweiler R (2000) The SWISS-PROT protein sequence database and its supplement TrEMBL in 2000. *Nucleic Acids Res* 28(1):45-48.
17. Zdobnov EM & Apweiler R (2001) InterProScan--an integration platform for the signature-recognition methods in InterPro. *Bioinformatics* 17(9):847-848.
18. Ashburner M, *et al.* (2000) Gene ontology: tool for the unification of biology. The Gene Ontology Consortium. *Nat Genet* 25(1):25-29.
19. Kanehisa M & Goto S (2000) KEGG: kyoto encyclopedia of genes and genomes. *Nucleic Acids Res* 28(1):27-30.
20. Mayer KF, *et al.* (2012) A physical, genetic and functional sequence assembly of the barley genome. *Nature* 491(7426):711-716.
21. Li L, Stoeckert CJ, Jr., & Roos DS (2003) OrthoMCL: identification of ortholog groups for eukaryotic genomes. *Genome Res* 13(9):2178-2189.
22. Edgar RC (2004) MUSCLE: multiple sequence alignment with high accuracy and high throughput. *Nucleic Acids Res* 32(5):1792-1797.
23. Guindon S & Gascuel O (2003) A simple, fast, and accurate algorithm to estimate large phylogenies by maximum likelihood. *Syst Biol* 52(5):696-704.
24. Guindon S, *et al.* (2010) New algorithms and methods to estimate maximum-likelihood phylogenies: assessing the performance of PhyML 3.0. *Syst Biol* 59(3):307-321.
25. Yang Z (2007) PAML 4: phylogenetic analysis by maximum likelihood. *Mol Biol Evol* 24(8):1586-1591.
26. Rambaut, A. & Drummond, A.J. Tracer v1.4. <http://beast.bio.ed.ac.uk/Tracer> (2007).
27. Tang H, *et al.* (2008) Unraveling ancient hexaploidy through multiply-aligned angiosperm gene maps. *Genome Res* 18(12):1944-1954.
28. Tang H, *et al.* (2008) Synteny and collinearity in plant genomes. *Science* 320(5875):486-488.



29. Huang S, *et al.* (2009) The genome of the cucumber, *Cucumis sativus* L. *Nat Genet* 41(12):1275-1281.
30. Anonymous (2010) Genome sequencing and analysis of the model grass *Brachypodium distachyon*. *Nature* 463(7282):763-768.
31. Salse J, *et al.* (2008) Identification and characterization of shared duplications between rice and wheat provide new insight into grass genome evolution. *Plant Cell* 20(1):11-24.
32. De Bie T, Cristianini N, Demuth JP, & Hahn MW (2006) CAFE: a computational tool for the study of gene family evolution. *Bioinformatics* 22(10):1269-1271.
33. Zhang Z, *et al.* (2006) KaKs\_Calculator: calculating Ka and Ks through model selection and model averaging. *Genomics, proteomics & bioinformatics* 4(4):259-263.
34. Li H, *et al.* (2009) The Sequence Alignment/Map format and SAMtools. *Bioinformatics* 25(16):2078-2079.
35. McKenna A, *et al.* (2010) The Genome Analysis Toolkit: a MapReduce framework for analyzing next-generation DNA sequencing data. *Genome Res* 20(9):1297-1303.
36. Price AL, *et al.* (2006) Principal components analysis corrects for stratification in genome-wide association studies. *Nat Genet* 38(8):904-909.
37. Tang H, Peng J, Wang P, & Risch NJ (2005) Estimation of individual admixture: analytical and study design considerations. *Genet Epidemiol* 28(4):289-301.
38. Tajima F (1989) Statistical method for testing the neutral mutation hypothesis by DNA polymorphism. *Genetics* 123(3):585-595.
39. Akey JM, Zhang G, Zhang K, Jin L, & Shriver MD (2002) Interrogating a high-density SNP map for signatures of natural selection. *Genome Research* 12(12):1805-1814.
40. MATLAB 8.0 and Statistics Toolbox 8.1, The MathWorks, Inc., Natick, Massachusetts, United States.
41. Liu Z, Sun F, Braun J, McGovern D, & Piantadosi S (2014) Multilevel Regularized Regression for Simultaneous Taxa Selection and Network Construction with Metagenomic Count Data. *Bioinformatics*.
42. Nasilowski K, Awrejcewicz J, & Lewandowski D (2014) Kinematic analysis of the finger exoskeleton using MATLAB/Simulink. *Acta of Bioengineering and Biomechanics / Wroclaw University of Technology* 16(3):129-134.
43. Matsumoto T, *et al.* (2011) Comprehensive sequence analysis of 24,783 barley full-length cDNAs derived from 12 clone libraries. *Plant Physiol* 156(1):20-28.
44. Wikstrom N, Savolainen V, & Chase MW (2001) Evolution of the angiosperms: calibrating the family tree. *Proc Biol Sci* 268(1482):2211-2220.
45. Arakaki M, *et al.* (2011) Contemporaneous and recent radiations of the world's major succulent plant lineages. *Proc Natl Acad Sci U S A* 108(20):8379-8384.

## II. Tables

**Table S1 Statistics of raw sequencing data**

| <b>Pair-end libraries</b> | <b>Insert size</b> | <b>Average reads length (bp)</b> | <b>Total data (Gb)</b> | <b>Sequence depth (X)</b> | <b>Physical depth (X)</b> |
|---------------------------|--------------------|----------------------------------|------------------------|---------------------------|---------------------------|
| Solexa reads              | 250 bp             | 150                              | 688.73                 | 153.73                    | 128.11                    |
|                           | 500 bp             | 100                              | 125.8                  | 28.08                     | 70.2                      |
|                           | 800 bp             | 100                              | 41.95                  | 9.36                      | 37.46                     |
|                           | 2 kb               | 90                               | 131.39                 | 29.33                     | 325.87                    |
|                           | 5 kb               | 90                               | 121.18                 | 27.05                     | 751.36                    |
|                           | 10 kb              | 90                               | 108.86                 | 24.3                      | 1349.95                   |
|                           | 20 kb              | 49                               | 51.34                  | 11.46                     | 2338.74                   |
|                           | 40 kb              | 49                               | 39.27                  | 8.77                      | 3577.81                   |
| Total                     | –                  | –                                | 1308.51                | 292.08                    | 8579.5                    |

**Table S2 Statistics of high-quality sequencing data**

| <b>Pair-end libraries</b> | <b>Insert size</b> | <b>Average reads length (bp)</b> | <b>Total data (Gb)</b> | <b>Sequence depth (X)</b> | <b>Physical depth (X)</b> |
|---------------------------|--------------------|----------------------------------|------------------------|---------------------------|---------------------------|
| Solexa reads              | 250 bp             | 150                              | 505.54                 | 112.84                    | 94.04                     |
|                           | 500 bp             | 100                              | 110.76                 | 24.72                     | 61.81                     |
|                           | 800 bp             | 100                              | 35.5                   | 7.92                      | 31.7                      |
|                           | 2 kb               | 90                               | 59.05                  | 13.18                     | 146.45                    |
|                           | 5 kb               | 90                               | 42.67                  | 9.52                      | 264.57                    |
|                           | 10 kb              | 90                               | 28.29                  | 6.31                      | 350.82                    |
|                           | 20 kb              | 49                               | 9.2                    | 2.05                      | 419.1                     |
|                           | 40 kb              | 49                               | 6.37                   | 1.42                      | 580.36                    |
| Total                     | –                  | –                                | 797.38                 | 177.99                    | 1948.84                   |

**Table S3 Genome size estimation by K-mer analysis**

| K-mer | Correct K-mer number | Peak | Genome size (Gb) | Repeat | Hete  | Reads coverage |
|-------|----------------------|------|------------------|--------|-------|----------------|
| 17    | 1.16E+11             | 26   | 4.48             | -      | -     | 29.72          |
| 19    | 1.91E+11             | 44   | 4.35             | 81.10% | 0.50% | 54.92          |
| 21    | 1.87E+11             | 43   | 4.34             | 78.20% | 0.41% | 55.25          |
| 23    | 1.82E+11             | 42   | 4.34             | 75.59% | 0.36% | 55.53          |
| 25    | 1.79E+11             | 41   | 4.38             | 82.18% | 0.42% | 55.24          |
| 27    | 1.75E+11             | 39   | 4.50             | 82.46% | 0.31% | 53.97          |
| 29    | 1.71E+11             | 39   | 4.39             | 82.43% | 0.37% | 55.49          |
| 31    | 1.67E+11             | 38   | 4.40             | 82.53% | 0.36% | 55.62          |

We estimated the genome size of Tibetan hulless barley of 4.48 Gbp by 17-mer analysis using about 30X of short-insert size sequencing data. We tested the K-mer analysis with Jellyfish software<sup>80</sup> under different K-mers with more sequencing data to check genome size, repeat content (Repeat) and heterozygous rate (Hete) of the genome. Please note that the K-mer analysis usually gets the most accurate genome size estimates at about 30X of sequencing data.

**Table S4 Statistics of de novo assembly of Tibetan hulless barley genome**

|                       | Contig        |         | Scaffold             |         |
|-----------------------|---------------|---------|----------------------|---------|
|                       | Size (bp)     | Number  | Size (bp)            | Number  |
| N90                   | 3,248         | 231,123 | <b>50,201</b>        | 17,626  |
| N80                   | 6,677         | 154,062 | 93,463               | 12,075  |
| N70                   | 10,064        | 109,752 | 136,739              | 8,641   |
| N60                   | 13,859        | 78,957  | 184,593              | 6,189   |
| N50                   | 18,067        | 55,924  | <b>242,004</b>       | 4,344   |
| Longest               | 276,948       | -       | 3,066,885            | -       |
| Total Size            | 3,643,636,907 | -       | <b>3,890,743,166</b> | -       |
| Total Number(≥200 bp) |               | 660,465 | -                    | 169,831 |
| Total Number(≥2 kb)   |               | 287,049 | -                    | 37,441  |

**Table S5 Comparison of assembled scaffolds with five BAC sequences of cultivated barley**

| BAC_ID                | Length  | Coverage | %     | Identity |
|-----------------------|---------|----------|-------|----------|
| HVVMRXALLmA0257K17_c1 | 154,523 | 148,919  | 96.37 | 98.94    |
| HVVMRXALLmA0104M01_c1 | 165,391 | 161,758  | 97.80 | 99.52    |
| HVVMRXALLmA0024C01_c1 | 174,348 | 158,009  | 90.63 | 98.23    |
| HVVMRXALLmA0103D13_c1 | 149,246 | 143,214  | 95.96 | 98.62    |
| HVVMRXALLmA0088K01_c1 | 181,550 | 171,570  | 94.50 | 98.85    |
| Average               | 165,012 | 156,694  | 95.05 | 98.83    |

**Table S6, Statistics of de novo transcriptome assembly result**

|         | Sample | Total number | Total length (nt) | Mean length (nt) | N50   |
|---------|--------|--------------|-------------------|------------------|-------|
| Contig  | G2     | 105,943      | 36,702,894        | 346              | 583   |
|         | S1     | 101,213      | 35,759,482        | 353              | 577   |
|         | Y2     | 99,185       | 37,787,189        | 380              | 685   |
| Unigene | G2     | 54,625       | 36,577,502        | 669              | 969   |
|         | S1     | 56,989       | 36,510,457        | 640              | 890   |
|         | Y2     | 56,496       | 40,922,106        | 724              | 1,061 |

**Table S7 Assessment of sequence coverage of the genome assembly by homologous search with de novo assembled transcriptome data**

| Samples* | Dataset  | No.    | Total length (Mb) | Covered by assembly (%) | With >90% sequence in one scaffold |             | With >50% sequence in one scaffold |             |
|----------|----------|--------|-------------------|-------------------------|------------------------------------|-------------|------------------------------------|-------------|
|          |          |        |                   |                         | No.                                | Percent (%) | No.                                | Percent (%) |
| G2       | >0 bp    | 52,753 | 35,523,701        | 90.60                   | 40,390                             | 76.56       | 45,674                             | 86.58       |
|          | >200 bp  | 52,753 | 35,523,701        | 90.60                   | 40,390                             | 76.56       | 45,674                             | 86.58       |
|          | >500 bp  | 23,735 | 26,486,011        | 94.66                   | 17,850                             | 75.21       | 21,264                             | 89.59       |
|          | >1000 bp | 10,842 | 17,330,445        | 95.70                   | 7,942                              | 73.25       | 9,795                              | 90.34       |
| S1       | >0 bp    | 55,799 | 35,795,745        | 95.60                   | 44,449                             | 79.66       | 50,563                             | 90.62       |
|          | >200 bp  | 55,799 | 35,795,745        | 95.60                   | 44,449                             | 79.66       | 50,563                             | 90.62       |
|          | >500 bp  | 24,498 | 26,068,131        | 96.47                   | 18,255                             | 74.52       | 22,110                             | 90.25       |
|          | >1000 bp | 10,225 | 15,958,209        | 96.15                   | 7,188                              | 70.30       | 9,159                              | 89.57       |
| Y2       | >0 bp    | 56,496 | 40,922,106        | 91.78                   | 43,650                             | 77.26       | 49,567                             | 87.74       |
|          | >200 bp  | 56,496 | 40,922,106        | 91.78                   | 43,650                             | 77.26       | 49,567                             | 87.74       |
|          | >500 bp  | 27,537 | 31,901,061        | 92.68                   | 20,205                             | 73.37       | 24,271                             | 88.14       |
|          | >1000 bp | 13,135 | 21,604,344        | 92.71                   | 9,236                              | 70.32       | 11,591                             | 88.25       |

\* The three samples G2, S1, Y2 came from root, immature spike, leaf and stem, respectively. Transcriptome was assembled to unigenes by Trinity.

**Table S8 Statistics for linkage groups construction**

| <b>Inform</b> | <b>Total length<br/>(Gb)</b> | <b>% Scaf</b> | <b>% Chrom</b> | <b>Scaf no.</b> | <b>Gene no.</b> | <b>% of gene<br/>no.</b> |
|---------------|------------------------------|---------------|----------------|-----------------|-----------------|--------------------------|
| Scaffold      | 3.89                         | 100           | -              | 169,831         | 39,197          | 100                      |
| Chrom         | 3.48                         | 89.41         | 100            | 28,374          | 36,566          | 93.29                    |
| With Order*   | 3.48                         | 89.34         | 99.93          | 28,339          | -               | -                        |

\* If the scaffold direction cannot be deduced, it keeps the original order. Therefore, the percentage of scaffold with order may be over-estimated. Chrom, chromosome; Scaf, Scaffold

**Table S9 Statistics for each pseudo-chromosomes**

| <b>Chromosome</b> | <b>Length (Mb)</b> | <b>Scaffold<br/>number</b> | <b>% of genome</b> |
|-------------------|--------------------|----------------------------|--------------------|
| 1H                | 425.00             | 3,601                      | 12.21              |
| 2H                | 562.09             | 4,776                      | 16.15              |
| 3H                | 525.90             | 4,384                      | 15.11              |
| 4H                | 501.49             | 3,347                      | 14.4               |
| 5H                | 476.44             | 4,063                      | 13.69              |
| 6H                | 468.32             | 3,739                      | 13.45              |
| 7H                | 522.19             | 4,464                      | 15                 |

**Table S10 General statistics of repeats in genome**

| <b>Type</b>       | <b>Repeat size (bp)</b> | <b>Percentage of genome (%)</b> |
|-------------------|-------------------------|---------------------------------|
| TRF               | 150,343,089             | 3.86                            |
| RepeatMasker      | 2,637,091,676           | 67.78                           |
| RepeatProteinMask | 926,152,304             | 23.80                           |
| De novo           | 3,040,288,155           | 78.14                           |
| Total             | 3,166,813,964           | 81.39                           |

**Table S11 TEs content in the assembled genome**

|         | RepBase TEs   |                          | TE proteins |                          | De novo       |                      | Combined TEs  |                          |
|---------|---------------|--------------------------|-------------|--------------------------|---------------|----------------------|---------------|--------------------------|
|         | Length (bp)   | Percentage of genome (%) | Length (bp) | Percentage of genome (%) | Length (bp)   | Percentage of genome | Length (bp)   | Percentage of genome (%) |
| DNA     | 245,017,883   | 6.30                     | 84,574,833  | 2.17                     | 249,631,774   | 6.42                 | 306,362,537   | 7.87                     |
| LINE    | 48,169,246    | 1.24                     | 53,296,750  | 1.37                     | 41,652,506    | 1.07                 | 74,507,684    | 1.91                     |
| SINE    | 413,423       | 0.01                     | 0           | 0.00                     | 0             | 0.00                 | 413,423       | 0.01                     |
| LTR     | 2,353,883,601 | 60.50                    | 788,297,959 | 20.26                    | 2,340,407,773 | 60.15                | 2,656,980,324 | 68.29                    |
| Other   | 8,703         | 0.00                     | 0           | 0.00                     | 0             | 0.00                 | 8,703         | 0.00                     |
| Unknown | 0             | 0.00                     | 152,001     | 0.00                     | 432,152,063   | 11.11                | 432,304,064   | 11.11                    |
| Total   | 2,637,091,676 | 67.78                    | 926,152,304 | 23.80                    | 3,016,748,833 | 77.54                | 3,121,892,234 | 80.24                    |

**Table S12 Comparison of repeat sequence in four genomes**

|                                   | <i>H. vulgare</i> L. var. <i>nudum</i> |                   | <i>O. sativa</i> |                   | <i>A. thaliana</i> |                   | <i>V. vinifera</i> |                   |
|-----------------------------------|----------------------------------------|-------------------|------------------|-------------------|--------------------|-------------------|--------------------|-------------------|
|                                   | Length (bp)                            | Percent in genome | Length (bp)      | Percent in genome | Length (bp)        | Percent in genome | Length (bp)        | Percent in genome |
| <b>Class I: Retro element</b>     |                                        |                   |                  |                   |                    |                   |                    |                   |
| <b>LTR Retrotransposon</b>        |                                        |                   |                  |                   |                    |                   |                    |                   |
| <b>Gypsy</b>                      | 1,669,626,336                          | 42.913            | 67,225,687       | 18.011            | 6,466,390          | 5.404             | 70,723,343         | 14.546            |
| <b>Copia</b>                      | 714,744,841                            | 18.370            | 12,697,237       | 3.402             | 1,916,698          | 1.602             | 43,604,253         | 8.968             |
| <b>Others</b>                     | 12,213,821                             | 0.314             | 2,455,034        | 0.658             | 154,863            | 0.129             | 5,436,208          | 1.118             |
| <b>Non- LTR Retrotransposon</b>   |                                        |                   |                  |                   |                    |                   |                    |                   |
| <b>LINE</b>                       | 68,812,934                             | 1.767             | 5,245,506        | 1.405             | 1,893,355          | 1.582             | 19,888,282         | 4.091             |
| <b>SINE</b>                       | 413,724                                | 0.011             | 1,124,541        | 0.301             | 74,595             | 0.062             | 14,914             | 0.003             |
| <b>Total Class I</b>              | 2,465,811,656                          | 63.376            | 88,748,005       | 23.777            | 10,505,901         | 8.779             | 139,667,000        | 28.726            |
| <b>Class II: DNA transposon</b>   |                                        |                   |                  |                   |                    |                   |                    |                   |
| <b>DNA Transposon Superfamily</b> |                                        |                   |                  |                   |                    |                   |                    |                   |
| <b>CMC</b>                        | 263,427,335                            | 6.771             | 14,041,570       | 3.762             | 1,773,022          | 1.482             | 5,988,350          | 1.232             |
| <b>hAT</b>                        | 10,139,525                             | 0.261             | 3,123,836        | 0.837             | 722,296            | 0.604             | 6,639,038          | 1.365             |
| <b>MULE</b>                       | 18,963,341                             | 0.487             | 12,978,576       | 3.477             | 4,101,327          | 3.427             | 12,913,084         | 2.656             |
| <b>Harbinger</b>                  | 5,327,839                              | 0.137             | 474,133          | 0.127             | 122,568            | 0.102             | 208,946            | 0.043             |
| <b>Helitron</b>                   | 1,743,443                              | 0.045             | 3,484,220        | 0.933             | 2,239,304          | 1.871             | 477,408            | 0.098             |
| <b>Others</b>                     | 28,965,349                             | 0.744             | 26,047,931       | 6.979             | 849,072            | 0.710             | 8,775,290          | 1.805             |
| <b>Total Class II</b>             | 328,566,832                            | 8.445             | 60,150,266       | 16.115            | 9,807,589          | 8.196             | 35,002,116         | 7.199             |
| <b>Others</b>                     | 160,704                                | 0.004             | 420,430          | 0.113             | 57,814             | 0.048             | 27,564             | 0.006             |

The above data are the combined statistics results from *RepeatMasker* and *RepeatProteinMask* based on the assembled genome sequences with >200 bp scaffolds included.

**Table S13 Statistics of transcriptome sequencing data in different samples**

| <b>Genotype</b>     | <b>Samples</b> | <b>Tissue</b>  | <b>Total raw reads (M)</b> | <b>Total clean reads (M)</b> | <b>Total nucleotides (Mb)</b> | <b>Q20 percentage (%)</b> | <b>GC percentage (%)</b> |
|---------------------|----------------|----------------|----------------------------|------------------------------|-------------------------------|---------------------------|--------------------------|
| <b>Lasa Goumang</b> | G2             | root           | 72.47                      | 64.75                        | 5827.44                       | 97.59                     | 56.46                    |
|                     | S1             | immature spike | 72.79                      | 65.33                        | 5879.64                       | 97.31                     | 57.84                    |
|                     | Y2             | leaf and stem  | 75.72                      | 65.33                        | 5879.64                       | 97.35                     | 56.16                    |
| <b>Himalaya 10</b>  | A1             | leaf           | 75.61                      | 67.79                        | 6101.54                       | 96.64                     | 55.83                    |
|                     | B2             | leaf           | 75.11                      | 67.95                        | 6115.13                       | 96.82                     | 54.84                    |
|                     | C3             | leaf           | 75.84                      | 64.22                        | 5780.00                       | 95.22                     | 55.57                    |
|                     | D4             | leaf           | 75.15                      | 66.79                        | 6010.96                       | 96.74                     | 55.45                    |
|                     | E5             | leaf           | 73.23                      | 65.40                        | 5886.12                       | 96.69                     | 56.21                    |
|                     | F6             | leaf           | 75.41                      | 69.19                        | 6227.49                       | 97.53                     | 54.47                    |
|                     | G7             | leaf           | 74.46                      | 68.07                        | 6126.09                       | 97.49                     | 55.49                    |
|                     | H8             | leaf           | 73.41                      | 66.20                        | 5958.16                       | 97.37                     | 56.19                    |
|                     | I9             | leaf           | 69.88                      | 64.24                        | 5781.42                       | 97.37                     | 56.63                    |



**Table S14 General statistics of predicted protein-coding genes**

|         | Gene set                             | Number  | Average gene length (bp) | Average CDS length (bp) | Average exon per gene | Average exon length (bp) | Average intron length (bp) |
|---------|--------------------------------------|---------|--------------------------|-------------------------|-----------------------|--------------------------|----------------------------|
| De novo | AUGUSTUS                             | 46,539  | 2013.78                  | 895.53                  | 3.99                  | 224.36                   | 373.81                     |
|         | GENSCAN                              | 36,023  | 7523.52                  | 525.62                  | 3.00                  | 174.99                   | 3492.43                    |
|         | <i>A. thaliana</i>                   | 33,339  | 2032.28                  | 824.60                  | 3.30                  | 249.61                   | 524.26                     |
|         | <i>B. distachyon</i>                 | 77,949  | 1919.41                  | 835.75                  | 2.60                  | 321.46                   | 677.35                     |
| Homolog | <i>O. sativa</i>                     | 53,452  | 1488.42                  | 710.92                  | 2.43                  | 292.04                   | 542.07                     |
|         | <i>S. bicolor</i>                    | 62,169  | 1887.34                  | 820.92                  | 2.71                  | 303.26                   | 624.73                     |
|         | <i>Z. mays</i>                       | 69,099  | 1049.13                  | 569.56                  | 1.85                  | 307.21                   | 561.56                     |
|         | Full length cDNA (HvuFLcDNA_rep)     | 17,547  | 5167.48                  | 1679.07                 | 5.59                  | 300.55                   | 760.55                     |
|         | Full length cDNA (HvuFLcDNA23614)    | 17,027  | 4774.78                  | 1660.58                 | 5.58                  | 297.62                   | 680.03                     |
|         | Tibetan hulless barley transcriptome | 134,416 | 1699.23                  | 833.92                  | 2.38                  | 349.73                   | 2251.22                    |
|         | Barley transcriptome                 | 122,407 | 2334.28                  | 1112.11                 | 2.74                  | 405.18                   | 2601.43                    |
|         | <b><i>H. vul</i> Gene-set</b>        | 36,151  | 4825.52                  | 1080.97                 | 4.41                  | 245.10                   | 1098.02                    |

Full length cDNA: 23,614 full length cDNAs, obtained from Matsumoto et al. (43), were taken as query sequences.

Cultivated barley transcriptome: downloaded from NCBI SRA, ERP001573 and ERP001600.

\*: 6,892 additional potential gene models could be predicted from flcDNA and cultivated barley transcriptome.

**Table S15 Summary of evidence for the GLEAN gene models**

|            | ≥20% overlap |           | ≥50% overlap |           | ≥80% overlap |           |
|------------|--------------|-----------|--------------|-----------|--------------|-----------|
|            | No.          | Ratio (%) | No.          | Ratio (%) | No.          | Ratio (%) |
| H (single) | 30           | 0.08      | 154          | 0.43      | 292          | 0.81      |
| H (more)   | 76           | 0.21      | 240          | 0.66      | 353          | 0.98      |
| P (single) | 0            | 0.00      | 1,490        | 4.12      | 5,558        | 15.37     |
| P (more)   | 0            | 0.00      | 1,605        | 4.44      | 2,040        | 5.64      |
| C (single) | 5            | 0.01      | 45           | 0.12      | 142          | 0.39      |
| C (more)   | 3            | 0.01      | 16           | 0.04      | 154          | 0.43      |
| HC         | 1,359        | 3.76      | 1,826        | 5.05      | 2,336        | 6.46      |
| PC         | 3,087        | 8.54      | 3,047        | 8.43      | 3,333        | 9.22      |
| PH         | 9,369        | 25.92     | 8,315        | 23.00     | 5,836        | 16.14     |
| PHC        | 22,222       | 61.47     | 19,127       | 52.91     | 14,462       | 40.00     |

P: *ab initio* prediction; H: homology-based prediction; C: cDNA or transcriptome-based prediction; single: with one gene source; more: with two or more gene sources.

**Table S16 Statistics of gene structures of five grass genomes**

| Gene set             | Number | Average<br>gene length<br>(bp) | Average<br>CDS length<br>(bp) | Average<br>exon per<br>gene | Average<br>exon length<br>(bp) | Average<br>intron<br>length (bp) |
|----------------------|--------|--------------------------------|-------------------------------|-----------------------------|--------------------------------|----------------------------------|
| <i>H. vulgare</i> *  | 36,151 | 4825.52                        | 1080.97                       | 4.41                        | 245.10                         | 1098.02                          |
| <i>Ae. tauschii</i>  | 32,645 | 2865.48                        | 1241.75                       | 5.06                        | 245.53                         | 400.19                           |
| <i>T. urartu</i>     | 34,862 | 3204.34                        | 1080.58                       | 4.68                        | 230.86                         | 577.71                           |
| <i>B. distachyon</i> | 26,413 | 2862.71                        | 1286.47                       | 5.04                        | 255.18                         | 390.02                           |
| <i>O. sativa</i>     | 35,402 | 2177.38                        | 998.58                        | 3.8                         | 262.69                         | 420.79                           |
| <i>S. bicolor</i>    | 27,159 | 2942.1                         | 1261.01                       | 4.85                        | 259.9                          | 436.44                           |
| <i>S. italica</i>    | 38,801 | 2522.24                        | 1087.33                       | 4.25                        | 256.1                          | 442.1                            |

\* *H. vulgare* L. var. *nudum*

**Table S17 Statistics of gene number for each pseudo-chromosomes**

| Chromosome | Gene Number |
|------------|-------------|
| 1H         | 4239        |
| 2H         | 5769        |
| 3H         | 5476        |
| 4H         | 3903        |
| 5H         | 5239        |
| 6H         | 4099        |
| 7H         | 5203        |

**Table S18 Statistics of function annotation**

---

|           |                   | <b>Number</b> | <b>Percent (%)</b> |
|-----------|-------------------|---------------|--------------------|
|           | Total             | 36,151        | ---                |
| Annotated | InterPro          | 24,255        | 67.09              |
|           | GO                | 18,494        | 51.16              |
|           | KEGG              | 17,474        | 48.34              |
|           | Swissprot         | 22,434        | 62.06              |
|           | TrEMBL            | 24,821        | 68.66              |
|           | Annotated (Total) | 29,730        | 82.24              |
|           | Unannotated       | 6,421         | 17.76              |

---

**Table S19 Genome coverage depth, coverage rate of Non-Tibetan barleys and Tibetan barleys**

| Samples                    | Coverage depth | Covered bases | Coverage rate |
|----------------------------|----------------|---------------|---------------|
| <i>Non-Tibetan barleys</i> |                |               |               |
| Morex                      | 17.84          | 3,384,433,849 | 92.89%        |
| Bowman                     | 16.42          | 3,459,979,441 | 94.96%        |
| Barke                      | 11.15          | 3,093,169,493 | 84.89%        |
| <i>H. spontaneum</i>       | 8.50           | 3,375,440,279 | 92.64%        |
| HarunaNijo                 | 6.41           | 3,000,452,695 | 82.35%        |
| Igri                       | 4.17           | 3,241,897,402 | 88.97%        |
| <i>Tibetan barleys</i>     |                |               |               |
| W1                         | 16.89          | 3,548,508,189 | 97.39         |
| W2                         | 14.57          | 3,429,783,574 | 94.13         |
| W3                         | 12.85          | 3,530,158,350 | 96.89         |
| W4                         | 15.13          | 3,559,398,267 | 97.69         |
| W5                         | 16.90          | 3,489,453,407 | 95.77         |
| C1                         | 15.32          | -             | 96.44         |
| C2                         | 15.41          | 3,507,826,619 | 96.27         |
| C3                         | 16.57          | -             | 96.66         |
| C4                         | 16.54          | 3,525,201,697 | 96.75         |
| C5                         | 14.46          | 3,538,395,436 | 97.11         |

Non-Tibetan barleys: downloaded from NCBI SRA, Morex (ERP001435), Bowman (ERP001449), Barke (ERP001450), *H. spontaneum* (ERP001434), ERP001451 (HarunaNijo), Igri (ERP001433). Tibetan barleys: W1, W2, W3, W4, W5, Tibetan wild barley; C1, C2, C3, C4, C5, Tibetan hulless barley.

**Table S20 Homologous sequences and specific sequences of Tibetan hulless barley and Morex barley**

| Subject                | Genome size (Mb) | Effective size (Mb)* | Alignment length (Mb) | Percent (%)# | Specific length (Mb) | Percent (%) |
|------------------------|------------------|----------------------|-----------------------|--------------|----------------------|-------------|
| Tibetan hulless barley | 3,891            | 3,644                | 3,356                 | 92.10        | 288                  | 7.90        |
| Morex (AC1)            | 2,136            | 2,113                | 2,000                 | 94.65        | 113                  | 5.35        |

\* effective size is the genome size excluding gaps

# percent mean the proportion of the length compared to effective size

**Table S21 Kegg enrichment of genes are involved in Tibetan hulless barley specific sequences**

| MapID    | MapTitle                                              | Gene number | AdjustedPv |
|----------|-------------------------------------------------------|-------------|------------|
| map00941 | Flavonoid biosynthesis                                | 42          | 1.28E-03   |
| map00945 | Stilbenoid, diarylheptanoid and gingerol biosynthesis | 51          | 3.36E-03   |
| map04075 | Plant hormone signal transduction                     | 123         | 3.36E-03   |

**Table S22 Statistics of orthologous gene numbers in 13 species**

| <b>Species</b>        | <b>Genes<br/>number</b> | <b>Genes in<br/>families</b> | <b>Unclustered<br/>genes</b> | <b>Family<br/>number</b> | <b>Unique<br/>families</b> | <b>Average genes<br/>per family</b> |
|-----------------------|-------------------------|------------------------------|------------------------------|--------------------------|----------------------------|-------------------------------------|
| <i>H. vulgare</i>     | 36,151                  | 28,303                       | 7,848                        | 18,849                   | 789                        | 1.5                                 |
| <i>A. thaliana</i>    | 26,637                  | 22,887                       | 3,750                        | 13,240                   | 805                        | 1.73                                |
| <i>C. papaya</i>      | 25,599                  | 18,080                       | 7,519                        | 12,972                   | 577                        | 1.39                                |
| <i>O. sativa</i>      | 35,402                  | 25,369                       | 10,033                       | 18,682                   | 778                        | 1.36                                |
| <i>V. vinifera</i>    | 25,329                  | 19,012                       | 6,317                        | 12,828                   | 720                        | 1.48                                |
| <i>S. bicolor</i>     | 27,159                  | 24,417                       | 2,742                        | 18,475                   | 95                         | 1.32                                |
| <i>Z. mays</i>        | 75,347                  | 49,552                       | 25,795                       | 22,929                   | 4,965                      | 2.16                                |
| <i>B. distachyon</i>  | 26,413                  | 23,524                       | 2,889                        | 17,794                   | 216                        | 1.32                                |
| <i>S. italica</i>     | 38,801                  | 31,389                       | 7,412                        | 18,941                   | 675                        | 1.66                                |
| <i>P. heterocycla</i> | 25,719                  | 19,375                       | 6,344                        | 13,323                   | 146                        | 1.45                                |
| <i>T. urartu</i>      | 30,023                  | 24,061                       | 5,962                        | 17,804                   | 263                        | 1.35                                |
| <i>Ae. tauschii</i>   | 32,645                  | 26,421                       | 6,224                        | 19,347                   | 188                        | 1.37                                |
| <i>T. aestivum</i>    | 111,982                 | 68,801                       | 43,181                       | 23,353                   | 2,582                      | 2.95                                |

Unclustered genes refer to species-specific genes; unique families refer to species-specific gene families.

**Table S23 Statistics for different types of orthologous genes in 13 species**

|                       | <i>H.vul</i> | <i>O.sat</i> | <i>S.bic</i> | <i>Z.may</i> | <i>B.dis</i> | <i>S.ita</i> | <i>P.het</i> | <i>T.ura</i> | <i>Ae.tau</i> | <i>T.aes</i> | <i>A.tha</i> | <i>C.pap</i> | <i>V.vin</i> |
|-----------------------|--------------|--------------|--------------|--------------|--------------|--------------|--------------|--------------|---------------|--------------|--------------|--------------|--------------|
| 1:1:1                 | 153          | 153          | 153          | 153          | 153          | 153          | 153          | 153          | 153           | 153          | 153          | 153          | 153          |
| N:N:N                 | 7,382        | 7,214        | 7,449        | 8,818        | 7,277        | 7,572        | 8,061        | 7,280        | 7,621         | 21,225       | 7,935        | 6,184        | 7,035        |
| <i>Poaceae</i>        | 1,260        | 1,144        | 1,160        | 1,213        | 1,142        | 1,248        | 1,159        | 1,439        | 1,536         | 2,892        | 0            | 0            | 0            |
| <i>Dicotyledoneae</i> | 0            | 0            | 0            | 0            | 0            | 0            | 0            | 0            | 0             | 0            | 1,034        | 770          | 875          |
| <i>Other</i>          | 16,730       | 14,857       | 15,425       | 20,319       | 14,372       | 17,266       | 9,683        | 14,610       | 16,692        | 35,826       | 10,720       | 8,620        | 8,674        |
| <i>SD</i>             | 2,778        | 2,001        | 230          | 19,049       | 580          | 5,150        | 319          | 579          | 419           | 8,705        | 3,045        | 2,353        | 2,275        |
| <i>ND</i>             | 7,848        | 10,033       | 2,742        | 25,795       | 2,889        | 7,412        | 6,344        | 5,962        | 6,224         | 43,181       | 3,750        | 7,519        | 6,317        |
| <i>Total</i>          | 36,151       | 35,402       | 27,159       | 75,347       | 26,413       | 38,801       | 25,719       | 30,023       | 32,645        | 111,982      | 26,637       | 25,599       | 25,329       |

1:1:1, single-copy orthologs, N:N:N, multi-copy orthologs, *Poaceae*, *Poaceae*-specific orthologs, *Dicotyledoneae*, *Dicotyledoneae*-specific orthologs, *SD*, duplicated species-specific genes, *ND*, species-specific genes. *H. vul*, *T.ura*, *T.aes*, *Ae. tau*, *B. dis*, *P.het*, *O. sat*, *S. bic*, *Z. may*, *S. ita*, *C. pap*, *A. tha*, and *V. vin* represent *H. vulgare*, *T. urartu*, *T.aestivum*, *Ae. tauschii*, *B. distachyon*, *P. heterocycla*, *O. sativa*, *S. bicolor*, *Z. mays*, *S. italic*, *C. papaya*, *A. thaliana*, and *V. vinifera*, respectively.

**Table S24 Calibration time points used in split time estimation**

|     | <b>Species 1</b>  | <b>Species 2</b>   | <b>Lower bound<br/>(Mya)</b> | <b>Upper bound<br/>(Mya)</b> | <b>Reference</b>     |
|-----|-------------------|--------------------|------------------------------|------------------------------|----------------------|
| (1) | <i>H. vulgare</i> | <i>A. thaliana</i> | 139                          | 156                          | Wikström et al. (44) |
| (2) | <i>H. vulgare</i> | <i>O. sativa</i>   | 34                           | -                            | Arakaki et al. (45)  |

**Table S25 Syntenic blocks between Tibetan hulless barley and other Poaceae genomes**

| <b>Genomes</b>                           | <b>No. of syntenic Blocks</b> | <b>No. of gene pairs in blocks</b> | <b>Average no. of gene pairs per block</b> | <b>Mean block length in query genome (Mb)</b> | <b>Mean block length in subject genome (Mb)</b> | <b>Percent in query genome (%)</b> | <b>Percent in subject genome (%)</b> |
|------------------------------------------|-------------------------------|------------------------------------|--------------------------------------------|-----------------------------------------------|-------------------------------------------------|------------------------------------|--------------------------------------|
| <i>H. vulgare</i> – <i>B. distachyon</i> | 596                           | 6,044                              | 10.14                                      | 3.79                                          | 0.41                                            | 58.03                              | 90.88                                |
| <i>H. vulgare</i> – <i>O. sativa</i>     | 462                           | 4,576                              | 9.9                                        | 3.56                                          | 0.37                                            | 42.24                              | 45.69                                |
| <i>H. vulgare</i> – <i>S. bicolor</i>    | 508                           | 5,045                              | 9.9311                                     | 3.84                                          | 0.62                                            | 50.1                               | 42.45                                |
| <i>H. vulgare</i> – <i>S. italica</i>    | 698                           | 6,592                              | 9.4441                                     | 3.99                                          | 0.46                                            | 71.67                              | 80.58                                |
| <i>H. vulgare</i> – <i>T. urartu</i>     | 486                           | 4,346                              | 8.9424                                     | 3.84                                          | 2.89                                            | 47.95                              | 30.19                                |
| <i>H. vulgare</i> – <i>Ae. tauschii</i>  | 637                           | 6,209                              | 9.7473                                     | 3.12                                          | 3.55                                            | 51.10                              | 54.58                                |
| hulless – Morex barley*                  | 454                           | 6,569                              | 14.47                                      | 8.46                                          | 14.52                                           | --                                 | --                                   |

\* Hulless barley represents *H. vulgare* L. var. *nudum*, Morex barley represents *H. vulgare* L. cv. Morex.



**Table S26 Number of expanded and contracted gene families**

| Branch                                             | Branch Length | n      | Expansions |        |                  | Contractions |        |                  | No Change | Avg. Exp. |
|----------------------------------------------------|---------------|--------|------------|--------|------------------|--------------|--------|------------------|-----------|-----------|
|                                                    |               |        | Families   | Genes  | Gene Gain/Family | Families     | Genes  | Gene Loss/Family |           |           |
| <i>H.vulgare</i>                                   | 17            | 18,577 | 2,185      | 4,816  | 2.20412          | 5,631        | 5,810  | 1.03179          | 15,978    | -0.0255   |
| <i>T.urartu</i>                                    | 10            | 17,232 | 1,281      | 1,638  | 1.27869          | 4,610        | 4,747  | 1.02972          | 15,289    | -0.07977  |
| <i>Ae.tauschii</i>                                 | 10            | 18,576 | 1,539      | 2,077  | 1.34958          | 2,979        | 3,025  | 1.01544          | 16,662    | -0.02432  |
| <i>Ae.tauschii/T.urartu</i>                        | 6             | 21,180 | 510        | 687    | 1.34706          | 2,789        | 2,854  | 1.02331          | 20,496    | -0.0556   |
| <i>Ae.tauschii,T.urartu/H.vulgare</i>              | 31            | 23,795 | 983        | 1,500  | 1.52594          | 1,976        | 1,994  | 1.00911          | 22,404    | -0.01267  |
| <i>B.distachyon</i>                                | 47            | 17,692 | 1,699      | 2,280  | 1.34197          | 8,000        | 8,117  | 1.01463          | 15,664    | -0.14976  |
| <i>B.distachyon/Ae.tauschii,T.urartu,H.vulgare</i> | 16            | 25,363 | 298        | 365    | 1.22483          | 1,019        | 1,019  | 1.00000          | 24,966    | -0.01678  |
| <i>P.heterocycla</i>                               | 64            | 13,196 | 3,060      | 3,542  | 1.15752          | 13,779       | 14,207 | 1.03106          | 9,444     | -0.27363  |
| <i>O.sativa</i>                                    | 71            | 18,597 | 2,591      | 3,717  | 1.43458          | 10,057       | 10,147 | 1.00895          | 15,434    | -0.16497  |
| <i>S.bicolor</i>                                   | 24            | 18,399 | 1,335      | 1,760  | 1.31835          | 7,304        | 8,101  | 1.10912          | 16,622    | -0.16269  |
| <i>Z.mays</i>                                      | 24            | 22,815 | 8,971      | 19,808 | 2.208            | 2,790        | 2,940  | 1.05376          | 13,500    | 0.432779  |
| <i>Z.mays/S.bicolor</i>                            | 26            | 25,261 | 840        | 1,298  | 1.54524          | 1,729        | 1,837  | 1.06246          | 24,308    | -0.01383  |
| <i>S.italica</i>                                   | 50            | 18,888 | 2,446      | 5,725  | 2.34056          | 8,282        | 8,360  | 1.00942          | 16,149    | -0.06761  |
| <i>S.italica/Z.mays,S.bicolor</i>                  | 29            | 26,877 | 644        | 833    | 1.29348          | 8,411        | 8,417  | 1.00071          | 26,125    | -0.19458  |
| <i>C.papaya</i>                                    | 45            | 12,891 | 1,388      | 3,075  | 2.21542          | 2,986        | 3,364  | 1.12659          | 10,843    | -0.00741  |

|                                                            |    |        |       |       |         |        |        |         |        |          |
|------------------------------------------------------------|----|--------|-------|-------|---------|--------|--------|---------|--------|----------|
| <i>A.thaliana</i>                                          | 45 | 13,227 | 3,805 | 6,906 | 1.81498 | 2,151  | 2,320  | 1.07857 | 9,261  | 0.117662 |
| <i>A.thaliana</i> / <i>C.papaya</i>                        | 26 | 15,217 | 198   | 319   | 1.61111 | 1,421  | 1,472  | 1.03589 | 14,922 | -0.02958 |
| <i>V.vinifera</i>                                          | 71 | 12,791 | 2,295 | 4,011 | 1.74771 | 4,259  | 4,477  | 1.05119 | 9,987  | -0.01196 |
| <i>V.vinifera</i> / <i>A.thaliana</i> ,<br><i>C.papaya</i> | 77 | 16,541 | 236   | 347   | 1.47034 | 23,568 | 23,743 | 1.00743 | 15,172 | -0.60027 |

---

Note: *T.aestivum*/*T.urartu* means the branch lead to the most recent common ancestor node of *T.aestivum* and *T.urartu*.

**Table S27 Gene gain in *H. vulgare* branch (FDR<0.05)**

| GO ID      | GO description                                                                                  | Type | Number of genes | FDR       |
|------------|-------------------------------------------------------------------------------------------------|------|-----------------|-----------|
| GO:0043232 | intracellular non-membrane-bounded organelle                                                    | CC   | 112             | 1.89E-118 |
| GO:0008270 | zinc ion binding                                                                                | MF   | 131             | 1.17E-69  |
| GO:0032991 | macromolecular complex                                                                          | CC   | 113             | 3.22E-56  |
| GO:0003735 | structural constituent of ribosome                                                              | MF   | 58              | 8.89E-51  |
| GO:0005840 | ribosome                                                                                        | CC   | 58              | 8.89E-51  |
| GO:0000786 | nucleosome                                                                                      | CC   | 54              | 7.37E-44  |
| GO:0006259 | DNA metabolic process                                                                           | BP   | 60              | 1.41E-43  |
| GO:0006334 | nucleosome assembly                                                                             | BP   | 54              | 2.72E-42  |
| GO:0046914 | transition metal ion binding                                                                    | MF   | 142             | 1.60E-34  |
| GO:0006412 | translation                                                                                     | BP   | 60              | 1.86E-33  |
| GO:0043229 | intracellular organelle                                                                         | CC   | 113             | 3.48E-32  |
| GO:0046872 | metal ion binding                                                                               | MF   | 143             | 4.00E-21  |
| GO:0044424 | intracellular part                                                                              | CC   | 116             | 4.17E-19  |
| GO:0090304 | nucleic acid metabolic process                                                                  | BP   | 115             | 7.99E-19  |
| GO:0044444 | cytoplasmic part                                                                                | CC   | 59              | 1.41E-18  |
| GO:0010467 | gene expression                                                                                 | BP   | 115             | 2.33E-18  |
| GO:0034645 | cellular macromolecule biosynthetic process                                                     | BP   | 116             | 3.66E-18  |
| GO:0043170 | macromolecule metabolic process                                                                 | BP   | 220             | 5.42E-18  |
| GO:0003676 | nucleic acid binding                                                                            | MF   | 131             | 1.20E-15  |
| GO:0006952 | defense response                                                                                | BP   | 33              | 5.27E-15  |
| GO:0006139 | nucleobase-containing compound metabolic process                                                | BP   | 116             | 1.16E-14  |
| GO:0005622 | intracellular                                                                                   | CC   | 125             | 1.23E-14  |
| GO:0044260 | cellular macromolecule metabolic process                                                        | BP   | 192             | 2.14E-14  |
| GO:0009058 | biosynthetic process                                                                            | BP   | 127             | 1.70E-12  |
| GO:0005737 | cytoplasm                                                                                       | CC   | 61              | 2.10E-12  |
| GO:0044249 | cellular biosynthetic process                                                                   | BP   | 119             | 1.26E-11  |
| GO:0016620 | oxidoreductase activity, acting on the aldehyde or oxo group of donors, NAD or NADP as acceptor | MF   | 13              | 2.11E-11  |
| GO:0034641 | cellular nitrogen compound metabolic process                                                    | BP   | 117             | 8.13E-11  |
| GO:0006950 | response to stress                                                                              | BP   | 50              | 2.73E-10  |
| GO:0009611 | response to wounding                                                                            | BP   | 14              | 3.14E-09  |
| GO:0008234 | cysteine-type peptidase activity                                                                | MF   | 20              | 6.11E-09  |
| GO:0003677 | DNA binding                                                                                     | MF   | 77              | 8.79E-07  |
| GO:0016844 | strictosidine synthase activity                                                                 | MF   | 8               | 1.02E-06  |
| GO:0044238 | primary metabolic process                                                                       | BP   | 225             | 1.18E-06  |
| GO:0043531 | ADP binding                                                                                     | MF   | 23              | 2.96E-06  |
| GO:0004867 | serine-type endopeptidase inhibitor activity                                                    | MF   | 14              | 5.33E-06  |
| GO:0044237 | cellular metabolic process                                                                      | BP   | 196             | 1.62E-05  |
| GO:2000112 | regulation of cellular macromolecule biosynthetic process                                       | BP   | 57              | 2.12E-05  |
| GO:0003700 | sequence-specific DNA binding transcription factor activity                                     | MF   | 28              | 2.20E-05  |
| GO:0010468 | regulation of gene expression                                                                   | BP   | 57              | 2.62E-05  |
| GO:0060255 | regulation of macromolecule metabolic process                                                   | BP   | 58              | 3.36E-05  |
| GO:0006355 | regulation of transcription, DNA-dependent                                                      | BP   | 55              | 4.07E-05  |
| GO:0080090 | regulation of primary metabolic process                                                         | BP   | 58              | 4.31E-05  |

|            |                                                     |    |     |          |
|------------|-----------------------------------------------------|----|-----|----------|
| GO:0031323 | regulation of cellular metabolic process            | BP | 58  | 4.62E-05 |
| GO:0004185 | serine-type carboxypeptidase activity               | MF | 9   | 1.66E-04 |
| GO:0004527 | exonuclease activity                                | MF | 8   | 3.19E-04 |
| GO:0005634 | nucleus                                             | CC | 37  | 1.05E-03 |
| GO:0070011 | peptidase activity, acting on L-amino acid peptides | MF | 29  | 2.22E-03 |
| GO:0004612 | phosphoenolpyruvate carboxykinase (ATP) activity    | MF | 2   | 6.52E-03 |
| GO:0019538 | protein metabolic process                           | BP | 105 | 6.80E-03 |
| GO:0004518 | nuclease activity                                   | MF | 10  | 1.26E-02 |
| GO:0006094 | gluconeogenesis                                     | BP | 2   | 2.03E-02 |
| GO:0006508 | proteolysis                                         | BP | 29  | 2.18E-02 |

BP: Biological Process; CC: Cellular Component; MF: Molecular Function

Total of 104 families, comprising 1,945 genes, were significantly ( $P < 0.05$ ) expanded in Tibetan hulless barley lineage.

**Table S28 Number of gene members in cold-related and AP2 TF families**

|                                | AP2/ERF |     |     |     |      | Total | ratio<br>ERF/DREB | Cold-related |
|--------------------------------|---------|-----|-----|-----|------|-------|-------------------|--------------|
|                                | Soloist | RAV | AP2 | ERF | DREB |       |                   |              |
| Tibetan                        |         |     |     |     |      |       |                   |              |
| Hulless<br>barley              | 1       | 5   | 21  | 95  | 37   | 159   | 2.57              | 230          |
| Morex                          | 1       | 7   | 14  | 64  | 35   | 121   | 1.83              | 219          |
| <i>Ae. tauschii</i>            | 1       | 1   | 24  | 48  | 35   | 109   | 1.37              | 216          |
| <i>T. urartu</i>               | 1       | 2   | 20  | 36  | 24   | 83    | 1.5               | 182          |
| <i>B.</i><br><i>distachyon</i> | 1       | 4   | 25  | 65  | 58   | 153   | 1.12              | 164          |
| <i>O. sativa</i>               | 1       | 5   | 29  | 87  | 58   | 180   | 1.5               | 132          |
| <i>Z. mays</i>                 | 1       | 3   | 31  | 96  | 90   | 221   | 1.07              | 148          |
| <i>A. thaliana</i>             | 1       | 6   | 17  | 65  | 56   | 145   | 1.16              | 209          |

**Table S29 Kegg pathways of genes with Ka/Ks >1 in hullless Morex pairwise kaks calculation**

| Pathway                                      | Gene number | Pathway ID |
|----------------------------------------------|-------------|------------|
| Plant-pathogen interaction                   | 31          | ko04626    |
| Plant hormone signal transduction            | 10          | ko04075    |
| Purine metabolism                            | 8           | ko00230    |
| Aminoacyl-tRNA biosynthesis                  | 6           | ko00970    |
| Phosphatidylinositol signaling system        | 6           | ko04070    |
| Pyrimidine metabolism                        | 5           | ko00240    |
| Glutathione metabolism                       | 5           | ko00480    |
| Metabolism of xenobiotics by cytochrome P450 | 5           | ko00980    |
| Drug metabolism - cytochrome P450            | 5           | ko00982    |
| Oocyte meiosis                               | 5           | ko04114    |
| Peroxisome                                   | 5           | ko04146    |
| Wnt signaling pathway                        | 5           | ko04310    |
| Circadian rhythm - plant                     | 5           | ko04712    |
| Insulin signaling pathway                    | 5           | ko04910    |
| Alzheimer's disease                          | 5           | ko05010    |

**Table S30 Information of barley accessions collected on Tibetan Plateau re-sequenced in this study**

| Group      | ID | Accessions       | Growth habit | Species                                    |
|------------|----|------------------|--------------|--------------------------------------------|
| Wild       | W1 | ZYM00963         | spring       | <i>H. vulgare</i> ssp. <i>agriocrithon</i> |
|            | W2 | ZYM01262         | spring       | <i>H. vulgare</i> ssp. <i>spontaneum</i>   |
|            | W3 | ZYM01288         | spring       | <i>H. vulgare</i> ssp. <i>agriocrithon</i> |
|            | W4 | ZYM01375         | spring       | <i>H. vulgare</i> ssp. <i>agriocrithon</i> |
|            | W5 | ZYM03251         | spring       | <i>H. vulgare</i> ssp. <i>spontaneum</i> - |
| Cultivated | C1 | Linzhiheiliuleng | spring       | <i>H. vulgare</i> L. var. <i>nudum</i>     |
|            | C2 | Z0237            | spring       | <i>H. vulgare</i> L. var. <i>nudum</i>     |
|            | C3 | Z0414            | spring       | <i>H. vulgare</i> L. var. <i>nudum</i>     |
|            | C4 | Z0699            | spring       | <i>H. vulgare</i> L. var. <i>nudum</i>     |
|            | C5 | Ailibai          | spring       | <i>H. vulgare</i> L. var. <i>nudum</i>     |

**Table S31 Statistics of SNPs and InDels in each of the re-sequenced genotypes**

| Genotypes         | No. of SNP       | Homo             | 1H-7H (SNP)      | Scaffold (SNP) | Percent in 1H-7H (%) (SNP) | No. of InDel   | 1H-7H (InDel)  | Scaffold (InDel) | 1H-7H rate (%) (InDel) |
|-------------------|------------------|------------------|------------------|----------------|----------------------------|----------------|----------------|------------------|------------------------|
| W1                | 9,206,608        | 6,282,956        | 8,328,963        | 877,645        | 90.47                      | 424,148        | 384,395        | 39,753           | 90.63                  |
| W2                | 15,759,191       | 15,217,207       | 14,282,306       | 1,476,885      | 90.63                      | 730,330        | 666,397        | 63,933           | 91.25                  |
| W3                | 12,396,204       | 8,161,457        | 11,272,379       | 1,123,825      | 90.93                      | 458,848        | 418,369        | 40,479           | 91.18                  |
| W4                | 12,560,313       | 7,041,767        | 11,431,772       | 1,128,541      | 91.02                      | 500,685        | 456,863        | 43,822           | 91.25                  |
| W5                | 9,268,837        | 8,804,341        | 8,356,983        | 911,854        | 90.16                      | 467,124        | 422,796        | 44,328           | 90.51                  |
| C1                | 5,436,423        | 5,074,957        | 4,810,232        | 626,191        | 88.48                      | 270,970        | 241,937        | 29,033           | 89.29                  |
| C2                | 6,827,268        | 6,447,694        | 6,096,296        | 730,972        | 89.29                      | 330,889        | 296,494        | 34,395           | 89.61                  |
| C3                | 6,614,414        | 6,194,737        | 5,914,618        | 699,796        | 89.42                      | 330,410        | 295,477        | 34,933           | 89.43                  |
| C4                | 6,465,945        | 6,067,573        | 5,776,439        | 689,506        | 89.34                      | 327,828        | 294,597        | 33,231           | 89.86                  |
| C5                | 5,692,681        | 5,332,031        | 5,072,079        | 620,602        | 89.10                      | 262,113        | 234,184        | 27,929           | 89.34                  |
| <b>Mean value</b> | <b>9,022,788</b> | <b>7,462,472</b> | <b>8,134,207</b> | <b>888,582</b> | <b>90.15</b>               | <b>410,335</b> | <b>371,151</b> | <b>39,184</b>    | <b>90.23</b>           |

Homo: No. of homozygous SNPs.

**Table S32 Statistics of population SNPs number in wild & cultivated barleys**

|                | Total No.  | 1H        | 2H        | 3H        | 4H        | 5H        | 6H        | 7H        | Scaffold  |
|----------------|------------|-----------|-----------|-----------|-----------|-----------|-----------|-----------|-----------|
| SNP (all)      | 36,469,491 | 3,674,569 | 5,224,386 | 5,721,956 | 3,531,350 | 4,955,351 | 4,818,203 | 4,799,247 | 3,744,429 |
| Indel (all)    | 2,281,198  | 229,319   | 332,270   | 353,253   | 220,394   | 314,423   | 286,077   | 308,706   | 236,756   |
| SNP (wild)     | 34,064,490 | 3,482,017 | 4,517,625 | 5,403,444 | 3,381,968 | 4,717,311 | 4,535,832 | 4,511,621 | 3,514,672 |
| SNP (Cultivar) | 17,872,045 | 1,706,407 | 2,640,130 | 3,145,674 | 1,184,379 | 2,410,753 | 2,667,631 | 1,944,525 | 2,172,546 |

**Table S33 Statistics of selective sweeps of Tibetan hulless barleys population**

| Chr   | Total size    | Sweep size | %    | Gene number |
|-------|---------------|------------|------|-------------|
| 1H    | 425,002,292   | 3,850,000  | 0.91 | 35          |
| 2H    | 562,091,317   | 4,600,000  | 0.82 | 56          |
| 3H    | 525,897,205   | 2,750,000  | 0.52 | 19          |
| 4H    | 501,487,783   | 4,275,000  | 0.85 | 40          |
| 5H    | 476,442,955   | 4,225,000  | 0.89 | 73          |
| 6H    | 468,321,367   | 950,000    | 0.20 | 16          |
| 7H    | 522,188,531   | 16,625,000 | 3.18 | 179         |
| total | 3,481,431,450 | 37,275,000 | 1.07 | 418         |

**Table S34 Genes under selective sweeps of plateau environment**

| Gene_id           | Symbol                | Description                                                                  |
|-------------------|-----------------------|------------------------------------------------------------------------------|
| Hvulgare_10000619 | ECH2                  | Enoyl-CoA hydratase 2, peroxisomal                                           |
| Hvulgare_10000640 | NA                    | NA                                                                           |
| Hvulgare_10000792 | ROC8                  | Homeobox-leucine zipper protein ROC8                                         |
| Hvulgare_10000796 | NA                    | NA                                                                           |
| Hvulgare_10000803 | NA                    | NA                                                                           |
| Hvulgare_10001098 | NA                    | NA                                                                           |
| Hvulgare_10001099 | GSVIVT000239<br>67001 | Peroxidase 4                                                                 |
| Hvulgare_10001638 | NA                    | NA                                                                           |
| Hvulgare_10001639 | Os06g0677700          | Zinc finger CCCH domain-containing protein 45                                |
| Hvulgare_10001642 | BHLH130               | Transcription factor bHLH130                                                 |
| Hvulgare_10001786 | NA                    | NA                                                                           |
| Hvulgare_10002292 | NA                    | NA                                                                           |
| Hvulgare_10002647 | NA                    | NA                                                                           |
| Hvulgare_10002648 | captC                 | Uncharacterized CDP-alcohol phosphatidyltransferase class-I family protein 3 |
| Hvulgare_10002649 | At2g17670             | Pentatricopeptide repeat-containing protein At2g17670                        |
| Hvulgare_10003121 | DRM2                  | DNA (cytosine-5)-methyltransferase DRM2                                      |
| Hvulgare_10003199 | NA                    | NA                                                                           |
| Hvulgare_10003247 | CML19                 | Putative calcium-binding protein CML19                                       |
| Hvulgare_10004106 | At1g68400             | Probable leucine-rich repeat receptor-like protein kinase At1g68400          |
| Hvulgare_10004107 | NA                    | NA                                                                           |
| Hvulgare_10004419 | Serp2                 | Stress-associated endoplasmic reticulum protein 2                            |
| Hvulgare_10004568 | CYP79A1               | Tyrosine N-monooxygenase                                                     |
| Hvulgare_10004767 | NA                    | Pyruvate kinase, cytosolic isozyme                                           |
| Hvulgare_10004834 | NA                    | NA                                                                           |
| Hvulgare_10005219 | NA                    | NA                                                                           |
| Hvulgare_10005220 | NA                    | NA                                                                           |
| Hvulgare_10005221 | NA                    | NA                                                                           |
| Hvulgare_10005421 | MRE11                 | Double-strand break repair protein MRE11                                     |
| Hvulgare_10005422 | LSM7                  | U6 snRNA-associated Sm-like protein LSm7                                     |
| Hvulgare_10005423 | WIR1A                 | Protein WIR1A                                                                |
| Hvulgare_10005435 | At2g16250             | Probable LRR receptor-like serine/threonine-protein kinase At2g16250         |
| Hvulgare_10005745 | Os06g0597200          | Probable protein phosphatase 2C 57                                           |
| Hvulgare_10005790 | PAIR1                 | Protein PAIR1                                                                |



|                   |              |                                                               |
|-------------------|--------------|---------------------------------------------------------------|
| Hvulgare_10005791 | NA           | Polyubiquitin                                                 |
| Hvulgare_10005830 | NA           | NA                                                            |
| Hvulgare_10006158 | nfrkb        | Nuclear factor related to kappa-B-binding protein             |
| Hvulgare_10006211 | CPI1         | Cycloeucalenol cycloisomerase                                 |
| Hvulgare_10006621 | ALDH2C4      | Aldehyde dehydrogenase family 2 member C4                     |
| Hvulgare_10006984 | NA           | NA                                                            |
| Hvulgare_10006985 | NA           | NA                                                            |
| Hvulgare_10007065 | FATB1        | Myristoyl-acyl-carrier-protein thioesterase, chloroplastic    |
| Hvulgare_10007159 | TT1          | Protein TRANSPARENT TESTA 1                                   |
| Hvulgare_10007632 | IAA23        | Auxin-responsive protein IAA23                                |
| Hvulgare_10007709 | NA           | NA                                                            |
| Hvulgare_10007716 | At5g01610    | Uncharacterized protein At5g01610                             |
| Hvulgare_10007880 | BPM3         | BTB/POZ and MATH domain-containing protein 3                  |
| Hvulgare_10007984 | HT1          | Serine/threonine-protein kinase HT1                           |
| Hvulgare_10008058 | NA           | NA                                                            |
| Hvulgare_10008637 | NA           | NA                                                            |
| Hvulgare_10008790 | ROC8         | Homeobox-leucine zipper protein ROC8                          |
| Hvulgare_10008791 | NA           | NA                                                            |
| Hvulgare_10008972 | CRK          | CDPK-related protein kinase                                   |
| Hvulgare_10008973 | NA           | NA                                                            |
| Hvulgare_10008978 | CBSDUF3      | DUF21 domain-containing protein At2g14520                     |
| Hvulgare_10008979 | SPAC2G11.09  | Uncharacterized membrane protein C2G11.09                     |
| Hvulgare_10008980 | OSH10        | Homeobox protein knotted-1-like 4                             |
| Hvulgare_10009094 | RPL19        | 50S ribosomal protein L19, chloroplastic                      |
| Hvulgare_10009122 | PP2A2        | Serine/threonine-protein phosphatase PP2A-2 catalytic subunit |
| Hvulgare_10009704 | NA           | NA                                                            |
| Hvulgare_10009705 | NA           | NA                                                            |
| Hvulgare_10009986 | ROC8         | Homeobox-leucine zipper protein ROC8                          |
| Hvulgare_10010139 | GALAK        | Galacturonokinase                                             |
| Hvulgare_10010464 | Os01g0246100 | Probable histone acetyltransferase HAC-like 3                 |
| Hvulgare_10010465 | NA           | NA                                                            |
| Hvulgare_10010466 | NA           | NA                                                            |
| Hvulgare_10010467 | NA           | NA                                                            |
| Hvulgare_10010615 | mak16-b      | Protein MAK16 homolog B                                       |
| Hvulgare_10010616 | NA           | NA                                                            |
| Hvulgare_10010658 | NA           | NA                                                            |
| Hvulgare_10010696 | CYP77A4      | Cytochrome P450 77A4                                          |
| Hvulgare_10010697 | NA           | NA                                                            |
| Hvulgare_10010698 | NA           | NA                                                            |

|                   |              |                                                                              |
|-------------------|--------------|------------------------------------------------------------------------------|
| Hvulgare_10011103 | RPL10AC      | 60S ribosomal protein L10a-3                                                 |
| Hvulgare_10011456 | NA           | NA                                                                           |
| Hvulgare_10011934 | NA           | NA                                                                           |
| Hvulgare_10012074 | NA           | NA                                                                           |
| Hvulgare_10012075 | NA           | Polyubiquitin                                                                |
| Hvulgare_10012076 | PHF1         | SEC12-like protein 1                                                         |
| Hvulgare_10012186 | At1g04390    | BTB/POZ domain-containing protein At1g04390                                  |
| Hvulgare_10012187 | DAP          | LL-diaminopimelate aminotransferase, chloroplastic                           |
| Hvulgare_10012403 | NA           | NA                                                                           |
| Hvulgare_10012609 | At4g18375    | KH domain-containing protein At4g18375                                       |
| Hvulgare_10012610 | At1g65750    | Putative ribonuclease H protein At1g65750                                    |
| Hvulgare_10012628 | GSTT3        | Glutathione S-transferase T3                                                 |
| Hvulgare_10012671 | NA           | NA                                                                           |
| Hvulgare_10012672 | Slc38a3      | Sodium-coupled neutral amino acid transporter 3                              |
| Hvulgare_10012947 | NA           | NA                                                                           |
| Hvulgare_10012948 | ABCF4        | ABC transporter F family member 4                                            |
| Hvulgare_10013097 | RPT6A        | 26S protease regulatory subunit 8 homolog A                                  |
| Hvulgare_10013393 | NA           | NA                                                                           |
| Hvulgare_10013466 | MBD2         | Methyl-CpG-binding domain-containing protein 2                               |
| Hvulgare_10013481 | ASHH3        | Histone-lysine N-methyltransferase ASHH3                                     |
| Hvulgare_10013482 | NA           | NA                                                                           |
| Hvulgare_10013917 | PRPF8        | Pre-mRNA-processing-splicing factor 8                                        |
| Hvulgare_10014700 | Os03g0212300 | B3 domain-containing protein Os03g0212300                                    |
| Hvulgare_10014701 | NA           | NA                                                                           |
| Hvulgare_10015198 | DRT100       | DNA-damage-repair/toleration protein DRT100                                  |
| Hvulgare_10015199 | NA           | NA                                                                           |
| Hvulgare_10015393 | NA           | NA                                                                           |
| Hvulgare_10015394 | Os04g0346900 | Putative B3 domain-containing protein Os04g0346900                           |
| Hvulgare_10015797 | PHF3         | PHD finger protein 3                                                         |
| Hvulgare_10015799 | St3gal2      | CMP-N-acetylneuraminate-beta-galactosamide-alpha-2,3<br>-sialyltransferase 2 |
| Hvulgare_10015800 | NA           | NA                                                                           |
| Hvulgare_10015801 | NA           | NA                                                                           |
| Hvulgare_10015802 | Gtpbp4       | Nucleolar GTP-binding protein 1                                              |
| Hvulgare_10015834 | NA           | NA                                                                           |
| Hvulgare_10015835 | ADH1         | Alcohol dehydrogenase 1                                                      |
| Hvulgare_10015836 | At3g47200    | UPF0481 protein At3g47200                                                    |
| Hvulgare_10015890 | NA           | NA                                                                           |
| Hvulgare_10015891 | UKL3         | Uridine kinase-like protein 3                                                |
| Hvulgare_10016088 | DAG          | DAG protein, chloroplastic                                                   |

|                   |              |                                                                      |
|-------------------|--------------|----------------------------------------------------------------------|
| Hvulgare_10016220 | Os03g0212300 | B3 domain-containing protein Os03g0212300                            |
| Hvulgare_10016221 | ROC8         | Homeobox-leucine zipper protein ROC8                                 |
| Hvulgare_10016222 | APX6         | Probable L-ascorbate peroxidase 6, chloroplastic                     |
| Hvulgare_10016368 | NA           | NA                                                                   |
| Hvulgare_10016377 | LHCA4        | Chlorophyll a-b binding protein 4, chloroplastic                     |
| Hvulgare_10016378 | At1g04910    | DUF246 domain-containing protein At1g04910                           |
| Hvulgare_10016638 | AHK5         | Histidine kinase 5                                                   |
| Hvulgare_10016940 | MKK4         | Mitogen-activated protein kinase kinase 4                            |
| Hvulgare_10016945 | NA           | NA                                                                   |
| Hvulgare_10016946 | PER1         | Peroxidase 1                                                         |
| Hvulgare_10017102 | NA           | NA                                                                   |
| Hvulgare_10017104 | At4g30825    | Pentatricopeptide repeat-containing protein At4g30825, chloroplastic |
| Hvulgare_10017348 | NA           | NA                                                                   |
| Hvulgare_10017380 | NA           | NA                                                                   |
| Hvulgare_10017381 | MZM1         | Mitochondrial zinc maintenance protein 1, mitochondrial              |
| Hvulgare_10017556 | FIB1         | rRNA 2'-O-methyltransferase fibrillarlin 1                           |
| Hvulgare_10017668 | yakA         | Probable serine/threonine-protein kinase yakA                        |
| Hvulgare_10017669 | alkbh8       | Alkylated DNA repair protein alkB homolog 8                          |
| Hvulgare_10017670 | PCMP-E95     | Pentatricopeptide repeat-containing protein At3g22150, chloroplastic |
| Hvulgare_10017747 | PARP1        | Poly [ADP-ribose] polymerase 1                                       |
| Hvulgare_10017840 | IAA27        | Auxin-responsive protein IAA27                                       |
| Hvulgare_10017932 | NA           | NA                                                                   |
| Hvulgare_10017933 | SCPL40       | Serine carboxypeptidase-like 40                                      |
| Hvulgare_10017934 | NA           | NA                                                                   |
| Hvulgare_10017935 | NA           | NA                                                                   |
| Hvulgare_10018021 | PARP2        | Poly [ADP-ribose] polymerase 2                                       |
| Hvulgare_10018022 | NA           | NA                                                                   |
| Hvulgare_10018023 | papA         | Poly(A) polymerase                                                   |
| Hvulgare_10018205 | At4g31140    | Glucan endo-1,3-beta-glucosidase 5                                   |
| Hvulgare_10018206 | CXE2         | Probable carboxylesterase 2                                          |
| Hvulgare_10018207 | CXE2         | Probable carboxylesterase 2                                          |
| Hvulgare_10018208 | UGT73D1      | UDP-glycosyltransferase 73D1                                         |
| Hvulgare_10018490 | CYP51G1      | Sterol 14-demethylase                                                |
| Hvulgare_10018826 | GTE8         | Transcription factor GTE8                                            |
| Hvulgare_10019125 | NA           | NA                                                                   |
| Hvulgare_10019152 | ARF25        | Auxin response factor 25                                             |
| Hvulgare_10019266 | At4g09670    | Uncharacterized oxidoreductase At4g09670                             |
| Hvulgare_10019588 | GTE8         | Transcription factor GTE8                                            |

|                   |              |                                                                               |
|-------------------|--------------|-------------------------------------------------------------------------------|
| Hvulgare_10019589 | NA           | NA                                                                            |
| Hvulgare_10019590 | NEC3         | Bifunctional monodehydroascorbate reductase and carbonic anhydrase nectarin-3 |
| Hvulgare_10020159 | NA           | NA                                                                            |
| Hvulgare_10020455 | TIFY9        | Protein TIFY 9                                                                |
| Hvulgare_10020620 | NA           | NA                                                                            |
| Hvulgare_10020621 | At2g28450    | Zinc finger CCCH domain-containing protein 24                                 |
| Hvulgare_10020673 | MAN7         | Mannan endo-1,4-beta-mannosidase 7                                            |
| Hvulgare_10020674 | NA           | NA                                                                            |
| Hvulgare_10020864 | Os03g0212300 | B3 domain-containing protein Os03g0212300                                     |
| Hvulgare_10021734 | hdhd3        | Haloacid dehalogenase-like hydrolase domain-containing protein 3              |
| Hvulgare_10021933 | SPS5         | Probable sucrose-phosphate synthase 5                                         |
| Hvulgare_10021990 | NA           | NA                                                                            |
| Hvulgare_10021991 | PCMP-E55     | Pentatricopeptide repeat-containing protein At1g31430                         |
| Hvulgare_10021992 | PHN1         | Protein argonaute PNH1                                                        |
| Hvulgare_10022334 | NA           | NA                                                                            |
| Hvulgare_10022335 | NA           | NA                                                                            |
| Hvulgare_10022336 | Taf7         | Transcription initiation factor TFIID subunit 7                               |
| Hvulgare_10022337 | NA           | Polyubiquitin                                                                 |
| Hvulgare_10022339 | NA           | NA                                                                            |
| Hvulgare_10022341 | NA           | NA                                                                            |
| Hvulgare_10022342 | RPL27A       | 60S ribosomal protein L27-1                                                   |
| Hvulgare_10022783 | PGP          | Phosphoglycolate phosphatase                                                  |
| Hvulgare_10022784 | NA           | NA                                                                            |
| Hvulgare_10022869 | ADT1         | Arogenate dehydratase/prephenate dehydratase 1, chloroplastic                 |
| Hvulgare_10022983 | MAPRE3       | Microtubule-associated protein RP/EB family member 3                          |
| Hvulgare_10022985 | NA           | NA                                                                            |
| Hvulgare_10023184 | CYP75B2      | Flavonoid 3'-monooxygenase                                                    |
| Hvulgare_10023185 | DTX1         | MATE efflux family protein DTX1                                               |
| Hvulgare_10023186 | At1g20180    | UPF0496 protein At1g20180                                                     |
| Hvulgare_10023187 | CRK          | CDPK-related protein kinase                                                   |
| Hvulgare_10023218 | Hsp90b1      | Endoplasmin                                                                   |
| Hvulgare_10023256 | At4g06598    | Uncharacterized protein At4g06598                                             |
| Hvulgare_10023257 | polr1d       | DNA-directed RNA polymerases I and III subunit RPAC2                          |
| Hvulgare_10023301 | NA           | NA                                                                            |
| Hvulgare_10023360 | NA           | NA                                                                            |
| Hvulgare_10023412 | spp27        | Upstream activation factor subunit spp27                                      |

|                   |              |                                                                                 |
|-------------------|--------------|---------------------------------------------------------------------------------|
| Hvulgare_10023413 | NA           | NA                                                                              |
| Hvulgare_10023612 | NA           | NA                                                                              |
| Hvulgare_10023766 | NA           | NA                                                                              |
| Hvulgare_10024083 | NA           | NA                                                                              |
| Hvulgare_10024084 | CML16        | Probable calcium-binding protein CML16                                          |
| Hvulgare_10024085 | NA           | NA                                                                              |
| Hvulgare_10025045 | IPP          | Soluble inorganic pyrophosphatase                                               |
| Hvulgare_10025046 | At5g52970    | Thylakoid lumenal 15.0 kDa protein 2, chloroplastic                             |
| Hvulgare_10025051 | CLPR2        | ATP-dependent Clp protease proteolytic subunit-related protein 2, chloroplastic |
| Hvulgare_10025052 | NA           | NA                                                                              |
| Hvulgare_10025053 | NA           | NA                                                                              |
| Hvulgare_10025054 | UTR3         | UDP-galactose/UDP-glucose transporter 3                                         |
| Hvulgare_10025193 | APUM5        | Pumilio homolog 5                                                               |
| Hvulgare_10025194 | NA           | NA                                                                              |
| Hvulgare_10025311 | NA           | NA                                                                              |
| Hvulgare_10025429 | RPL11        | 60S ribosomal protein L11                                                       |
| Hvulgare_10025618 | TANC2        | Protein TANC2                                                                   |
| Hvulgare_10025619 | PIP5K4       | Phosphatidylinositol-4-phosphate 5-kinase 4                                     |
| Hvulgare_10025785 | RPM1         | Disease resistance protein RPM1                                                 |
| Hvulgare_10025786 | UGT91B1      | UDP-glycosyltransferase 91B1                                                    |
| Hvulgare_10025787 | RPP13        | Disease resistance protein RPP13                                                |
| Hvulgare_10025815 | RGA2         | Disease resistance protein RGA2                                                 |
| Hvulgare_10025830 | At2g28370    | CASP-like protein At2g28370                                                     |
| Hvulgare_10025831 | NA           | NA                                                                              |
| Hvulgare_10025832 | gacL         | Rho GTPase-activating protein gacL                                              |
| Hvulgare_10026382 | NA           | NA                                                                              |
| Hvulgare_10026383 | Os03g0212300 | B3 domain-containing protein Os03g0212300                                       |
| Hvulgare_10027088 | WAK5         | Wall-associated receptor kinase 5                                               |
| Hvulgare_10027090 | NA           | NA                                                                              |
| Hvulgare_10027091 | NA           | NA                                                                              |
| Hvulgare_10027092 | NA           | NA                                                                              |
| Hvulgare_10027377 | At4g13360    | 3-hydroxyisobutyryl-CoA hydrolase-like protein 3, mitochondrial                 |
| Hvulgare_10028187 | Nfrkb        | Nuclear factor related to kappa-B-binding protein                               |
| Hvulgare_10028314 | NA           | Enoyl-[acyl-carrier-protein] reductase [NADH], chloroplastic                    |
| Hvulgare_10028315 | At4g01730    | Probable S-acyltransferase At4g01730                                            |
| Hvulgare_10028316 | XRN4         | 5'-3' exoribonuclease 4                                                         |
| Hvulgare_10028317 | Os02g0794700 | Leucine aminopeptidase 2, chloroplastic                                         |

|                   |              |                                                  |
|-------------------|--------------|--------------------------------------------------|
| Hvulgare_10028318 | NA           | NA                                               |
| Hvulgare_10028465 | NA           | NA                                               |
| Hvulgare_10028656 | NA           | NA                                               |
| Hvulgare_10028658 | FLA7         | Fasciclin-like arabinogalactan protein 7         |
| Hvulgare_10028669 | ACT1         | Actin-1                                          |
| Hvulgare_10028874 | At2g28370    | CASP-like protein At2g28370                      |
| Hvulgare_10028876 | NIP1-3       | Aquaporin NIP1-3                                 |
| Hvulgare_10028877 | NA           | NA                                               |
| Hvulgare_10028878 | NA           | NA                                               |
| Hvulgare_10028881 | At5g02060    | CASP-like protein At5g02060                      |
| Hvulgare_10028882 | CML21        | Probable calcium-binding protein CML21           |
| Hvulgare_10028910 | RPS12        | 40S ribosomal protein S12                        |
| Hvulgare_10028911 | GltP         | Glycolipid transfer protein                      |
| Hvulgare_10028912 | At1g10320    | Zinc finger CCCH domain-containing protein 5     |
| Hvulgare_10028913 | Os02g0557500 | Zinc finger CCCH domain-containing protein 16    |
| Hvulgare_10028914 | NA           | NA                                               |
| Hvulgare_10028916 | NA           | NA                                               |
| Hvulgare_10029414 | NA           | NA                                               |
| Hvulgare_10029833 | NA           | NA                                               |
| Hvulgare_10029834 | Os03g0650900 | Probable E3 ubiquitin-protein ligase BAH1-like 1 |
| Hvulgare_10030134 | YKT61        | VAMP-like protein YKT61                          |
| Hvulgare_10030488 | FER          | Receptor-like protein kinase FERONIA             |
| Hvulgare_10030489 | BHLH79       | Transcription factor bHLH79                      |
| Hvulgare_10030490 | VAMP726      | Putative vesicle-associated membrane protein 726 |
| Hvulgare_10030926 | ATL40        | RING-H2 finger protein ATL40                     |
| Hvulgare_10031116 | NA           | NA                                               |
| Hvulgare_10031117 | ytfP         | Uncharacterized protein ytfP                     |
| Hvulgare_10031118 | VAR3         | Zinc finger protein VAR3, chloroplastic          |
| Hvulgare_10031119 | MGST3        | Microsomal glutathione S-transferase 3           |
| Hvulgare_10031120 | At2g02850    | Basic blue protein                               |
| Hvulgare_10031934 | NA           | NA                                               |
| Hvulgare_10032680 | yjbI         | Group 2 truncated hemoglobin yjbI                |
| Hvulgare_10032821 | NA           | NA                                               |
| Hvulgare_10032822 | NA           | NA                                               |
| Hvulgare_10032823 | NHX2         | Sodium/hydrogen exchanger 2                      |
| Hvulgare_10033167 | NA           | NA                                               |
| Hvulgare_10033514 | YSL3         | Probable metal-nicotianamine transporter YSL3    |
| Hvulgare_10033515 | VPS35B       | Vacuolar protein sorting-associated protein 35B  |
| Hvulgare_10033683 | NA           | NA                                               |
| Hvulgare_10034207 | NA           | NA                                               |

|                   |              |                                                                                      |
|-------------------|--------------|--------------------------------------------------------------------------------------|
| Hvulgare_10034208 | HARB11       | Putative nuclease HARB11                                                             |
| Hvulgare_10034221 | UGT75D1      | UDP-glycosyltransferase 75D1                                                         |
| Hvulgare_10034353 | G6PDH        | Glucose-6-phosphate 1-dehydrogenase, cytoplasmic isoform                             |
| Hvulgare_10034490 | VTC5         | GDP-L-galactose phosphorylase 2                                                      |
| Hvulgare_10034593 | Os01g0639100 | DEAD-box ATP-dependent RNA helicase 2                                                |
| Hvulgare_10034595 | NA           | NA                                                                                   |
| Hvulgare_10035071 | OSH10        | Homeobox protein knotted-1-like 4                                                    |
| Hvulgare_10035305 | NA           | NA                                                                                   |
| Hvulgare_10035306 | NA           | NA                                                                                   |
| Hvulgare_10035419 | PCMP-E13     | Pentatricopeptide repeat-containing protein At5g56310                                |
| Hvulgare_10035420 | KCBP         | Kinesin-like calmodulin-binding protein                                              |
| Hvulgare_10036361 | ATJ10        | Chaperone protein dnaJ 10                                                            |
| Hvulgare_10036362 | NA           | NA                                                                                   |
| Hvulgare_10036363 | NA           | NA                                                                                   |
| Hvulgare_10036694 | KCS4         | 3-ketoacyl-CoA synthase 4                                                            |
| Hvulgare_10036840 | NA           | NA                                                                                   |
| Hvulgare_10036920 | PCF1         | Transcription factor PCF1                                                            |
| Hvulgare_10037134 | STAR2        | UPF0014 membrane protein STAR2                                                       |
| Hvulgare_10037135 | NA           | NA                                                                                   |
| Hvulgare_10037136 | At5g15730    | Probable leucine-rich repeat receptor-like serine/threonine-protein kinase At5g15730 |
| Hvulgare_10037138 | NA           | NA                                                                                   |
| Hvulgare_10037353 | PCMP-E101    | Pentatricopeptide repeat-containing protein At4g18840                                |
| Hvulgare_10037354 | HSP81-3      | Heat shock protein 81-3                                                              |
| Hvulgare_10037382 | Apeh         | Acylamino-acid-releasing enzyme                                                      |
| Hvulgare_10037383 | NA           | NA                                                                                   |
| Hvulgare_10037612 | AHK5         | Histidine kinase 5                                                                   |
| Hvulgare_10037846 | GAM1         | Transcription factor GAMYB                                                           |
| Hvulgare_10037847 | NA           | NA                                                                                   |
| Hvulgare_10037848 | ISA1         | Isoamylase 1, chloroplastic                                                          |
| Hvulgare_10038482 | NA           | NA                                                                                   |
| Hvulgare_10038483 | NA           | NA                                                                                   |
| Hvulgare_10038484 | NA           | NA                                                                                   |
| Hvulgare_10038654 | ROMT-17      | Tricin synthase 2                                                                    |
| Hvulgare_10038655 | At1g05000    | Probable tyrosine-protein phosphatase At1g05000                                      |
| Hvulgare_10038657 | NA           | NA                                                                                   |
| Hvulgare_10039401 | NA           | NA                                                                                   |
| Hvulgare_10039402 | FAR1         | Protein FAR-RED IMPAIRED RESPONSE 1                                                  |
| Hvulgare_10039403 | At1g04910    | DUF246 domain-containing protein At1g04910                                           |

|                   |              |                                                               |
|-------------------|--------------|---------------------------------------------------------------|
| Hvulgare_10039404 | NA           | NA                                                            |
| Hvulgare_10039407 | CEBIP        | Chitin elicitor-binding protein                               |
| Hvulgare_10039408 | NA           | Histone H4                                                    |
| Hvulgare_10039409 | NA           | Histone H4                                                    |
| Hvulgare_10039410 | FMO1         | Probable flavin-containing monooxygenase 1                    |
| Hvulgare_10039411 | FMO1         | Probable flavin-containing monooxygenase 1                    |
| Hvulgare_10039412 | FMO1         | Probable flavin-containing monooxygenase 1                    |
| Hvulgare_10039480 | ASPSCR1      | Tether containing UBX domain for GLUT4                        |
| Hvulgare_10039510 | NA           | NA                                                            |
| Hvulgare_10039511 | yqxC         | Putative rRNA methyltransferase YqxC                          |
| Hvulgare_10039617 | NA           | NA                                                            |
| Hvulgare_10039618 | ROMT-15      | Tricin synthase 1                                             |
| Hvulgare_10039619 | NA           | NA                                                            |
| Hvulgare_10039641 | NA           | NA                                                            |
| Hvulgare_10039881 | NA           | NA                                                            |
| Hvulgare_10039882 | NA           | NA                                                            |
| Hvulgare_10039883 | NA           | NA                                                            |
| Hvulgare_10039884 | PAM18        | Mitochondrial import inner membrane translocase subunit TIM14 |
| Hvulgare_10040112 | NA           | NA                                                            |
| Hvulgare_10040113 | NRT2.1       | High-affinity nitrate transporter 2.1                         |
| Hvulgare_10040114 | NRT2.1       | High-affinity nitrate transporter 2.1                         |
| Hvulgare_10040138 | Os08g0520100 | RNA pseudourine synthase 3, mitochondrial                     |
| Hvulgare_10040139 | At3g42630    | Pentatricopeptide repeat-containing protein At3g42630         |
| Hvulgare_10040140 | TIAL1        | Nucleolysin TIAR                                              |
| Hvulgare_10040220 | SCPL40       | Serine carboxypeptidase-like 40                               |
| Hvulgare_10040565 | NA           | NA                                                            |
| Hvulgare_10040695 | ATB          | F-box protein At-B                                            |
| Hvulgare_10040696 | CSN6A        | COP9 signalosome complex subunit 6a                           |
| Hvulgare_10040755 | MRS2-I       | Magnesium transporter MRS2-I                                  |
| Hvulgare_10041234 | NA           | NA                                                            |
| Hvulgare_10041236 | sec14        | Sec14 cytosolic factor                                        |
| Hvulgare_10041331 | GLX-I        | Lactoylglutathione lyase                                      |
| Hvulgare_10041336 | NA           | NA                                                            |
| Hvulgare_10041759 | NA           | 6-hydroxynicotinate 3-monooxygenase                           |
| Hvulgare_10041760 | NDKR         | Nucleoside diphosphate kinase 1                               |
| Hvulgare_10041761 | NA           | Auxin-induced protein 5NG4                                    |
| Hvulgare_10041970 | NA           | NA                                                            |
| Hvulgare_10041972 | argA         | Amino-acid acetyltransferase                                  |
| Hvulgare_10041973 | At1g80150    | Pentatricopeptide repeat-containing protein At1g80150,        |



|                   |              |                                                                         |
|-------------------|--------------|-------------------------------------------------------------------------|
|                   |              | mitochondrial                                                           |
| Hvulgare_10042455 | At1g05700    | Probable LRR receptor-like serine/threonine-protein kinase At1g05700    |
| Hvulgare_10042459 | NA           | NA                                                                      |
| Hvulgare_10042687 | HKT7         | Probable cation transporter HKT7                                        |
| Hvulgare_10042819 | NA           | NA                                                                      |
| Hvulgare_10043175 | WRAP73       | WD repeat-containing protein WRAP73                                     |
| Hvulgare_10043176 | FBX5         | Protein ARABIDILLO 1                                                    |
| Hvulgare_10043501 | At3g06920    | Pentatricopeptide repeat-containing protein At3g06920                   |
| Hvulgare_10043505 | NA           | NA                                                                      |
| Hvulgare_10043760 | NA           | NA                                                                      |
| Hvulgare_10043873 | SCOA         | Succinyl-CoA ligase [ADP-forming] subunit alpha-1, mitochondrial        |
| Hvulgare_10043875 | rf-5         | RING finger protein 5                                                   |
| Hvulgare_10043876 | THIC         | Phosphomethylpyrimidine synthase, chloroplastic                         |
| Hvulgare_10044127 | Esyt1        | Extended synaptotagmin-1                                                |
| Hvulgare_10044128 | Esyt2        | Extended synaptotagmin-2                                                |
| Hvulgare_10044440 | NA           | NA                                                                      |
| Hvulgare_10044442 | Os08g0360100 | Chloroplastic group IIA intron splicing facilitator CRS1, chloroplastic |
| Hvulgare_10044467 | LECRK91      | L-type lectin-domain-containing receptor kinase IX.1                    |
| Hvulgare_10044468 | NA           | NA                                                                      |
| Hvulgare_10044527 | topA         | DNA topoisomerase 1                                                     |
| Hvulgare_10044529 | TY5A         | Putative transposon Ty5-1 protein YCL074W                               |
| Hvulgare_10044748 | GPDL1        | Probable glycerophosphoryl diester phosphodiesterase 1                  |
| Hvulgare_10045485 | NA           | NA                                                                      |
| Hvulgare_10045640 | NA           | NA                                                                      |
| Hvulgare_10045641 | NA           | NA                                                                      |
| Hvulgare_10045994 | NA           | NA                                                                      |
| Hvulgare_10045995 | WAK5         | Wall-associated receptor kinase 5                                       |
| Hvulgare_10045996 | HP1          | Histidine-containing phosphotransfer protein 1                          |
| Hvulgare_10045997 | NA           | NA                                                                      |
| Hvulgare_10045998 | NA           | NA                                                                      |
| Hvulgare_10046002 | RPS2         | Disease resistance protein RPS2                                         |
| Hvulgare_10046263 | IDI2         | Methylthioribose-1-phosphate isomerase                                  |
| Hvulgare_10046882 | MBD2         | Methyl-CpG-binding domain-containing protein 2                          |
| Hvulgare_10046883 | NA           | NA                                                                      |
| Hvulgare_10046885 | NA           | NA                                                                      |
| Hvulgare_10046886 | NA           | NA                                                                      |
| Hvulgare_10047060 | NA           | NA                                                                      |

|                   |              |                                                               |
|-------------------|--------------|---------------------------------------------------------------|
| Hvulgare_10047061 | JKD          | Zinc finger protein JACKDAW                                   |
| Hvulgare_10047397 | TAX10        | 3'-N-debenzoyl-2'-deoxytaxol N-benzoyltransferase             |
| Hvulgare_10047537 | MBD2         | Methyl-CpG-binding domain-containing protein 2                |
| Hvulgare_10047538 | NA           | NA                                                            |
| Hvulgare_10047540 | MBD2         | Methyl-CpG-binding domain-containing protein 2                |
| Hvulgare_10047541 | MBD2         | Methyl-CpG-binding domain-containing protein 2                |
| Hvulgare_10048289 | ARF21        | Auxin response factor 21                                      |
| Hvulgare_10048334 | NA           | NA                                                            |
| Hvulgare_10048335 | NA           | NA                                                            |
| Hvulgare_10048337 | NA           | NA                                                            |
| Hvulgare_10048338 | NA           | NA                                                            |
| Hvulgare_10048339 | NA           | NA                                                            |
| Hvulgare_10049312 | CYP89A2      | Cytochrome P450 89A2                                          |
| Hvulgare_10049313 | OsI_033149   | UPF0496 protein 4                                             |
| Hvulgare_10049332 | nep1         | Aspartic proteinase nepenthesin-1                             |
| Hvulgare_10049479 | NA           | NA                                                            |
| Hvulgare_10050337 | Os04g0650000 | Oryzain alpha chain                                           |
| Hvulgare_10050441 | NA           | NA                                                            |
| Hvulgare_10050442 | NA           | NA                                                            |
| Hvulgare_10050969 | At1g61330    | Putative FBD-associated F-box protein At1g61330               |
| Hvulgare_10050970 | PAA1         | Putative copper-transporting ATPase PAA1                      |
| Hvulgare_10050971 | NA           | NA                                                            |
| Hvulgare_10051826 | PER43        | Peroxidase 43                                                 |
| Hvulgare_10052277 | MLO1         | MLO-like protein 1                                            |
| Hvulgare_10052292 | NA           | NA                                                            |
| Hvulgare_10052293 | ADT2         | Arogenate dehydratase/prephenate dehydratase 2, chloroplastic |
| Hvulgare_10052294 | APX2         | L-ascorbate peroxidase 2, cytosolic                           |
| Hvulgare_10052295 | RMD1         | Sporulation protein RMD1                                      |
| Hvulgare_10052640 | SH3GL1       | Endophilin-A2                                                 |
| Hvulgare_10052641 | yqeI         | Probable RNA-binding protein YqeI                             |
| Hvulgare_10053406 | PSKR2        | Phytosulfokine receptor 2                                     |
| Hvulgare_10053407 | TDT          | Tonoplast dicarboxylate transporter                           |
| Hvulgare_10053409 | NA           | NA                                                            |
| Hvulgare_10053410 | NA           | NA                                                            |
| Hvulgare_10054500 | RPL31        | 60S ribosomal protein L31                                     |
| Hvulgare_10054501 | NA           | NA                                                            |
| Hvulgare_10054838 | Os01g0639100 | DEAD-box ATP-dependent RNA helicase 2                         |
| Hvulgare_10054839 | CYP71D55     | Premnaspirodiene oxygenase                                    |
| Hvulgare_10055789 | NA           | NA                                                            |

|                   |              |                                    |
|-------------------|--------------|------------------------------------|
| Hvulgare_10055794 | Os08g0500300 | Probable protein phosphatase 2C 66 |
| Hvulgare_10055796 | Bud13        | BUD13 homolog                      |
| Hvulgare_10056304 | NA           | NA                                 |
| Hvulgare_10056305 | yitV         | Putative esterase yitV             |

**Table S35 Kegg pathway of genes involved in selective sweeps**

| <b>Pathway</b>                                        | <b>Gene number</b> | <b>Pathway ID</b> |
|-------------------------------------------------------|--------------------|-------------------|
| Plant-pathogen interaction                            | 15                 | ko04626           |
| Plant hormone signal transduction                     | 14                 | ko04075           |
| Phenylpropanoid biosynthesis                          | 7                  | ko00940           |
| mRNA surveillance pathway                             | 7                  | ko03015           |
| Spliceosome                                           | 7                  | ko03040           |
| Stilbenoid, diarylheptanoid and gingerol biosynthesis | 6                  | ko00945           |
| Ribosome biogenesis in eukaryotes                     | 6                  | ko03008           |
| Ribosome                                              | 6                  | ko03010           |
| RNA degradation                                       | 6                  | ko03018           |
| Protein processing in endoplasmic reticulum           | 6                  | ko04141           |
| Purine metabolism                                     | 5                  | ko00230           |
| Pyrimidine metabolism                                 | 5                  | ko00240           |
| Phenylalanine metabolism                              | 5                  | ko00360           |
| Glutathione metabolism                                | 5                  | ko00480           |
| Polycyclic aromatic hydrocarbon degradation           | 5                  | ko00624           |
| Aminobenzoate degradation                             | 5                  | ko00627           |
| Methane metabolism                                    | 5                  | ko00680           |
| Flavonoid biosynthesis                                | 5                  | ko00941           |
| Ascorbate and aldarate metabolism                     | 4                  | ko00053           |
| Limonene and pinene degradation                       | 4                  | ko00903           |
| Drug metabolism - cytochrome P450                     | 4                  | ko00982           |
| Bisphenol degradation                                 | 3                  | ko00363           |
| Metabolism of xenobiotics by cytochrome P450          | 3                  | ko00980           |
| RNA transport                                         | 3                  | ko03013           |
| RNA polymerase                                        | 3                  | ko03020           |
| PPAR signaling pathway                                | 3                  | ko03320           |
| Endocytosis                                           | 3                  | ko04144           |
| Circadian rhythm - plant                              | 3                  | ko04712           |
| Chagas disease (American trypanosomiasis)             | 3                  | ko05142           |

**Table S36 50 genes randomly collected from Table S34 and 10 stressful environmental variables for correlation analysis**

(a)

| <b>Name in the graph</b> | <b>Gene</b>                                                                 |
|--------------------------|-----------------------------------------------------------------------------|
| A1                       | Enoyl-CoA hydratase 2, peroxisomal                                          |
| A2                       | Peroxidase 4                                                                |
| A3                       | DNA (cytosine-5)-methyltransferase DRM2                                     |
| A4                       | Putative calcium-binding protein CML19                                      |
| A5                       | Probable leucine-rich repeat receptor-like protein kinase At1g68400         |
| A6                       | Stress-associated endoplasmic reticulum protein 2                           |
| A7                       | Tyrosine N-monooxygenase                                                    |
| A8                       | Cycloeucaleanol cycloisomerase                                              |
| A9                       | Protein TRANSPARENT TESTA 1                                                 |
| A10                      | Auxin-responsive protein IAA23                                              |
| A11                      | Serine/threonine-protein kinase HT1                                         |
| A12                      | CDPK-related protein kinase                                                 |
| A13                      | DUF21 domain-containing protein At2g14520                                   |
| A14                      | Homeobox protein knotted-1-like 4                                           |
| A15                      | Serine/threonine-protein phosphatase PP2A-2 catalytic subunit               |
| A16                      | Galacturonokinase                                                           |
| A17                      | Probable histone acetyltransferase HAC-like 3                               |
| A18                      | CMP-N-acetylneuraminate-beta-galactosamide-alpha-2,3-sialyltransferase<br>2 |
| A19                      | Alcohol dehydrogenase 1                                                     |
| A20                      | Uridine kinase-like protein 3                                               |
| A21                      | DAG protein, chloroplastic                                                  |
| A22                      | Probable L-ascorbate peroxidase 6, chloroplastic                            |
| A23                      | Chlorophyll a-b binding protein 4, chloroplastic                            |
| A24                      | Histidine kinase 5                                                          |
| A25                      | Mitogen-activated protein kinase kinase 4                                   |
| A26                      | Peroxidase 1                                                                |
| A27                      | Probable serine/threonine-protein kinase yakA                               |
| A28                      | Poly [ADP-ribose] polymerase 1                                              |
| A29                      | Serine carboxypeptidase-like 40                                             |
| A30                      | Glucan endo-1,3-beta-glucosidase 5                                          |
| A31                      | Protein argonaute PNH1                                                      |

|     |                                             |
|-----|---------------------------------------------|
| A32 | Phosphoglycolate phosphatase                |
| A33 | Flavonoid 3'-monooxygenase                  |
| A34 | Endoplasmic                                 |
| A35 | Phosphatidylinositol-4-phosphate 5-kinase 4 |
| A36 | UDP-glycosyltransferase 91B1                |
| A37 | Probable S-acyltransferase At4g01730        |
| A38 | Aquaporin NIP1-3                            |
| A39 | Sodium/hydrogen exchanger 2                 |
| A40 | UDP-glycosyltransferase 75D1                |
| A41 | GDP-L-galactose phosphorylase 2             |
| A42 | 3-ketoacyl-CoA synthase 4                   |
| A43 | Heat shock protein 81-3                     |
| A44 | Histidine kinase 5                          |
| A45 | Magnesium transporter MRS2-I                |
| A46 | Lactoylglutathione lyase                    |
| A47 | 6-hydroxynicotinate 3-monooxygenase         |
| A48 | Amino-acid acetyltransferase                |
| A49 | Probable cation transporter HKT7            |
| A50 | Putative transposon Ty5-1 protein YCL074W   |

---

**(b)**

---

| <b>Symbol</b> | <b>Feature</b>     |
|---------------|--------------------|
| B1            | Salinity           |
| B2            | Oxygen             |
| B3            | Amylase            |
| B4            | Radiation          |
| B5            | CO2                |
| B6            | Drought            |
| B7            | Temperature (cold) |
| B8            | Temperature (heat) |
| B9            | Long and short day |
| B10           | Dormancy           |

---

### III. Figures

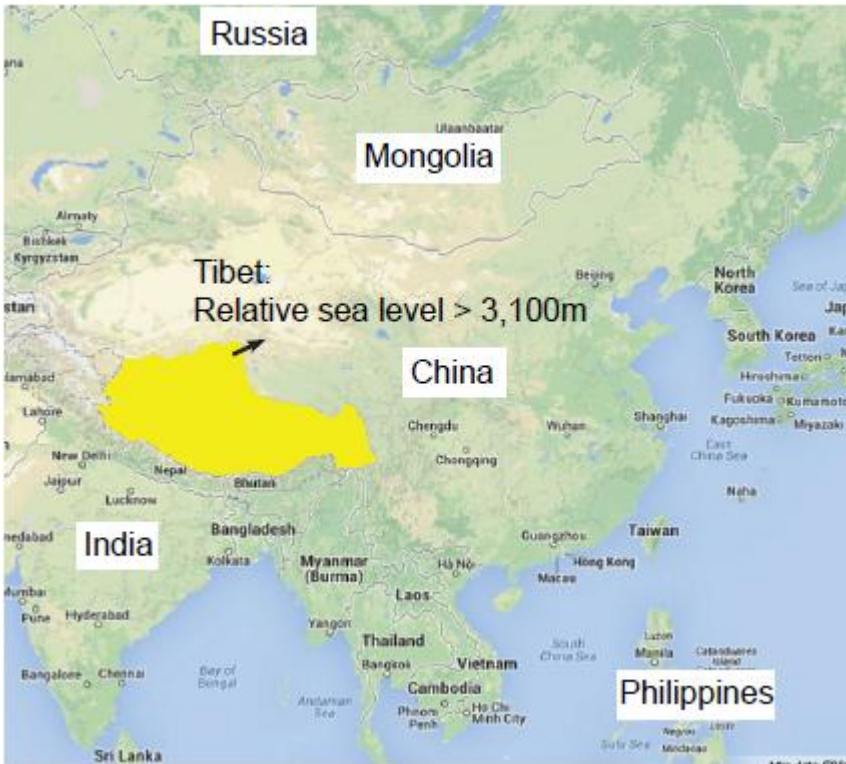

**Fig. S1, The Tibetan hulless barley is the main crop for people living in Tibet, China. The relative sea level of Tibet is more than 3,100 m.**

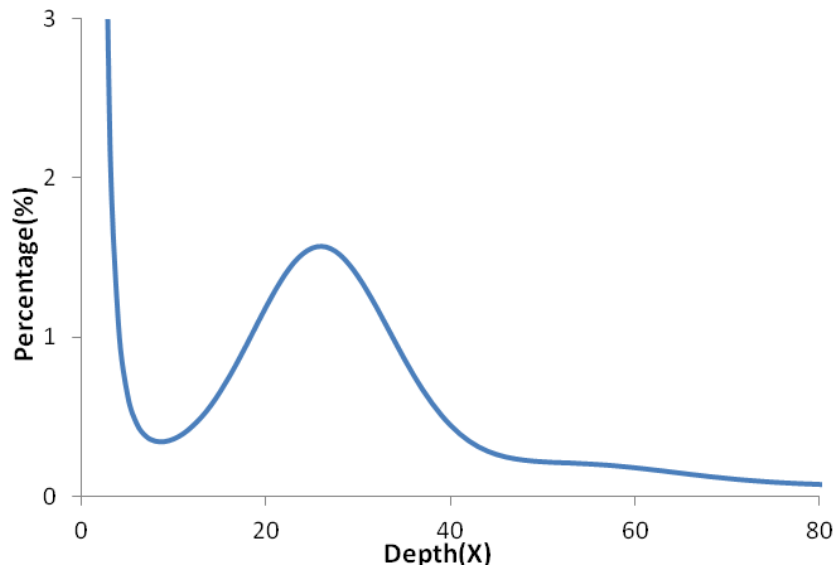

**Fig. S2, Distribution of 17-mer frequency in the sequencing reads. 133 Gb data was retained for 17-mer analysis, the peak of distribution is about 26X coverage; the genome size can be estimated as 4.48 Gb (Genome Size=K-mer number/Peak depth).**

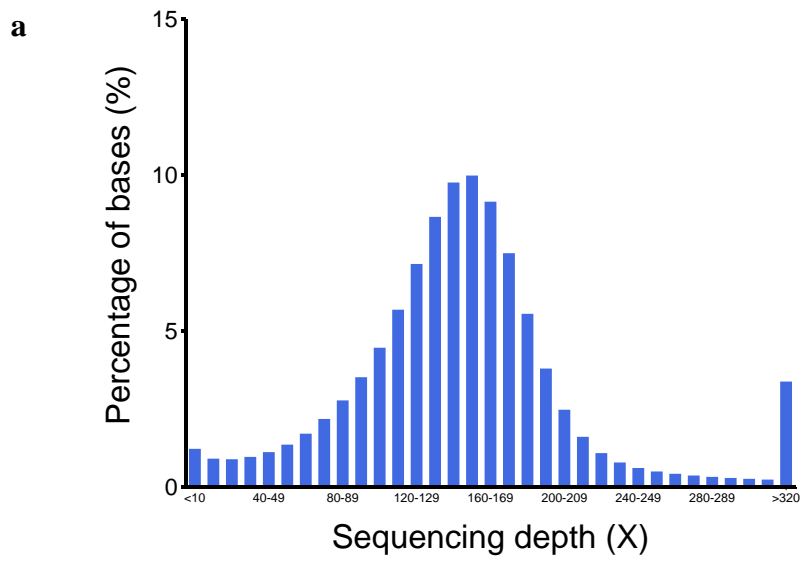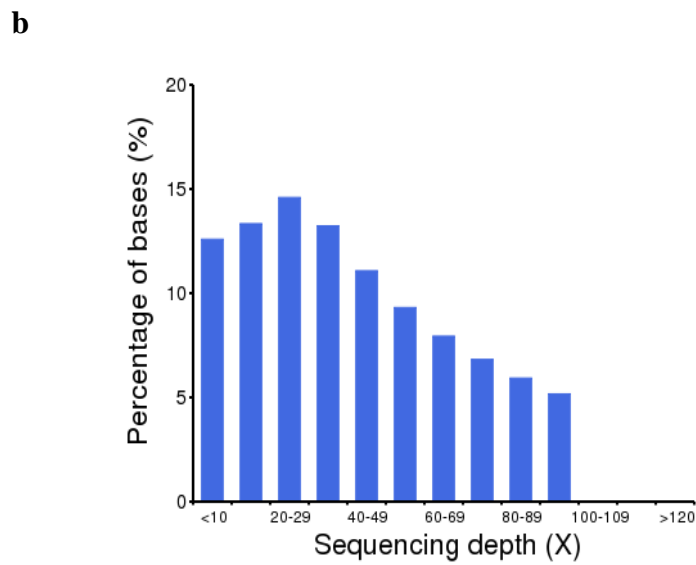

**Fig. S3, Sequencing depth distribution for bases of whole genome (a) and scaffolds with length less than 200 bp (b). X-axis is depth and Y-axis is proportional to the base number divided by total bases.**

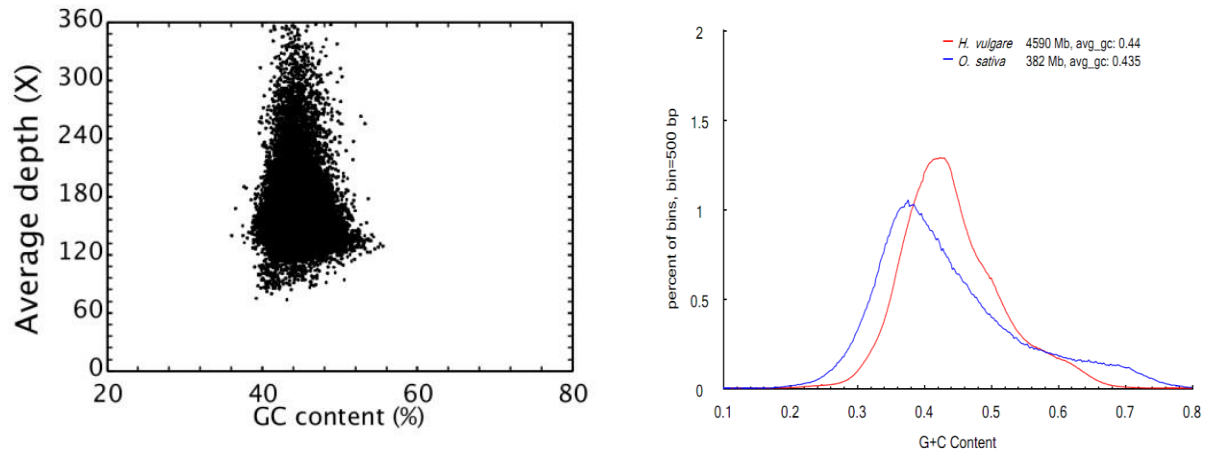

**Fig. S4, GC content and sequencing depth. a, GC\_depth distribution of Tibetan hulless barley. X-axis represents GC content; Y-axis represents average depth. b, Comparison of GC content distributions in Tibetan hulless barley and rice genomes.**



HVVMRXALLmA0257K17\_c1 (Genbank ID: AC250041.1)

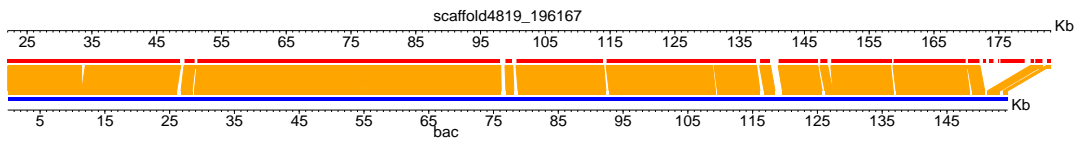

HVVMRXALLmA0104M01\_c1 (Genbank ID: AC253422.1)

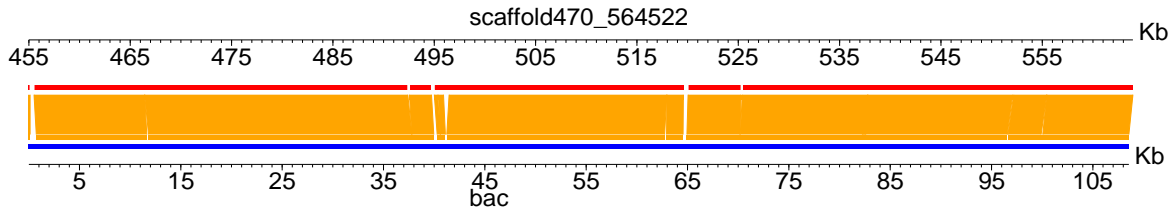

HVVMRXALLmA0024C01\_c1 (Genbank ID: AC253057.1)

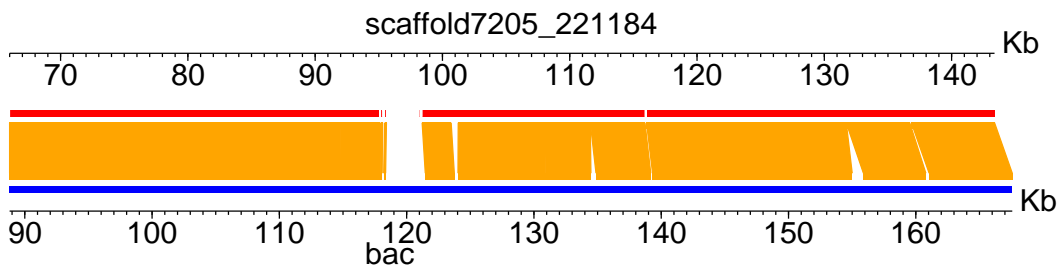

HVVMRXALLeA0103D13\_c1 (Genbank ID: AC248476.1)

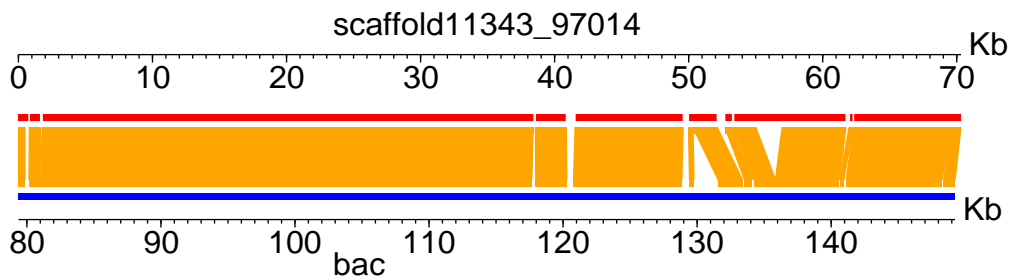

HVVMRXALLeA0088K01\_c1 (Genbank ID: AC250041.1)

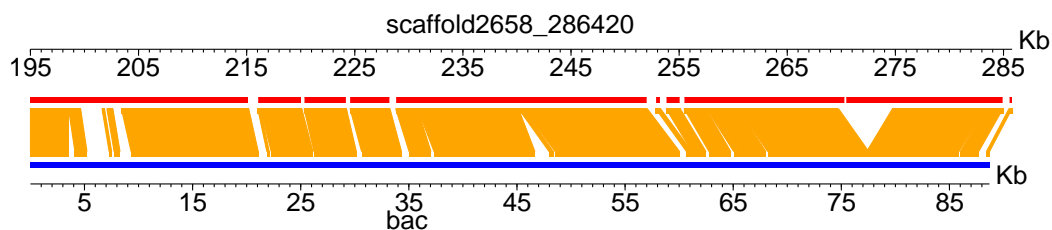

**Fig. S5, Comparison of assembled scaffolds with five BAC sequences of cultivated barley**

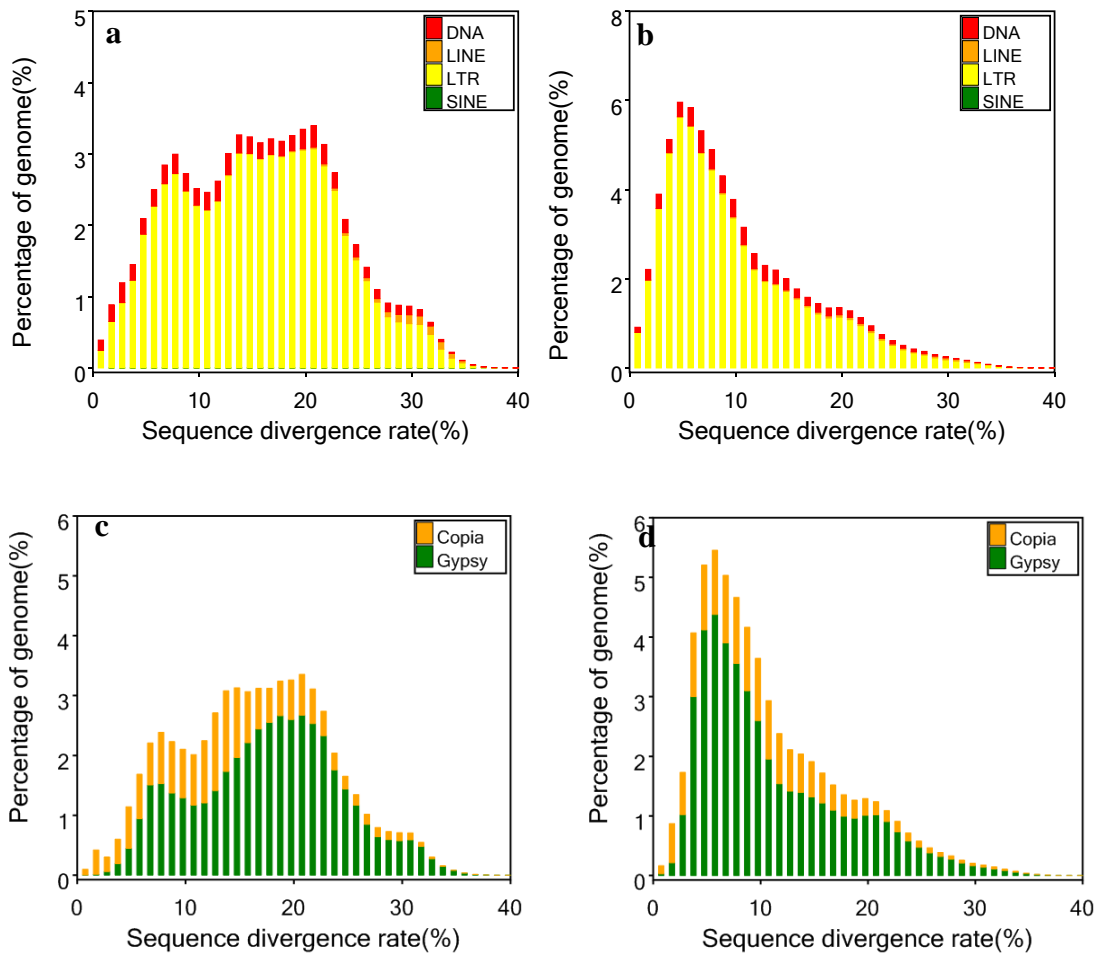

**Fig. S6, Divergence rate distribution of different types of TE predicted with *Rebase* (a, c) and *de novo* (b, d) methods. Divergence rate computed between predicted TE sequence in genome and consensus sequence in the *Rebase* or *de novo* predicted TE library. The above figures show that most of the *de novo* predicted repeats are recently transposed repeats, which are active in the genome. The Copia and Gypsy subfamily of TE repeats are the most enriched in *H. vulgare* genome.**

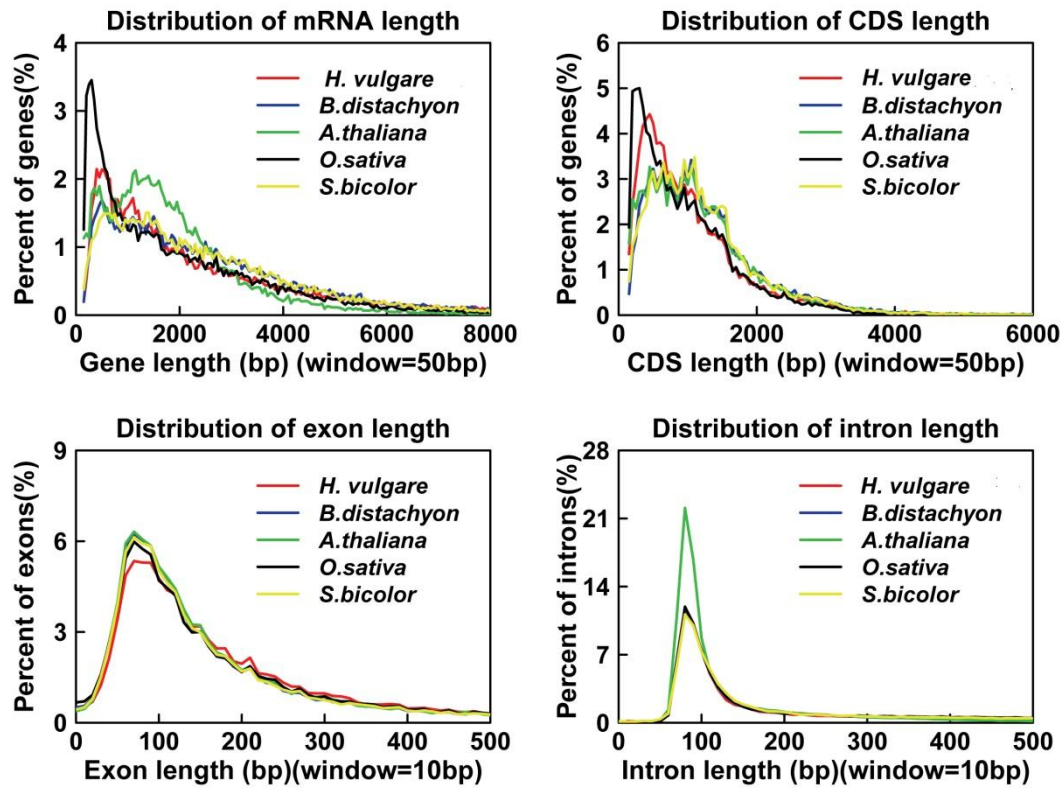

**Fig. S7, Comparison of length distribution of gene, exon, intron, and CDS in Tibetan hulless barley (*H. vulgare*) and four other species. Window means the length of every point in the horizontal ordinate.**

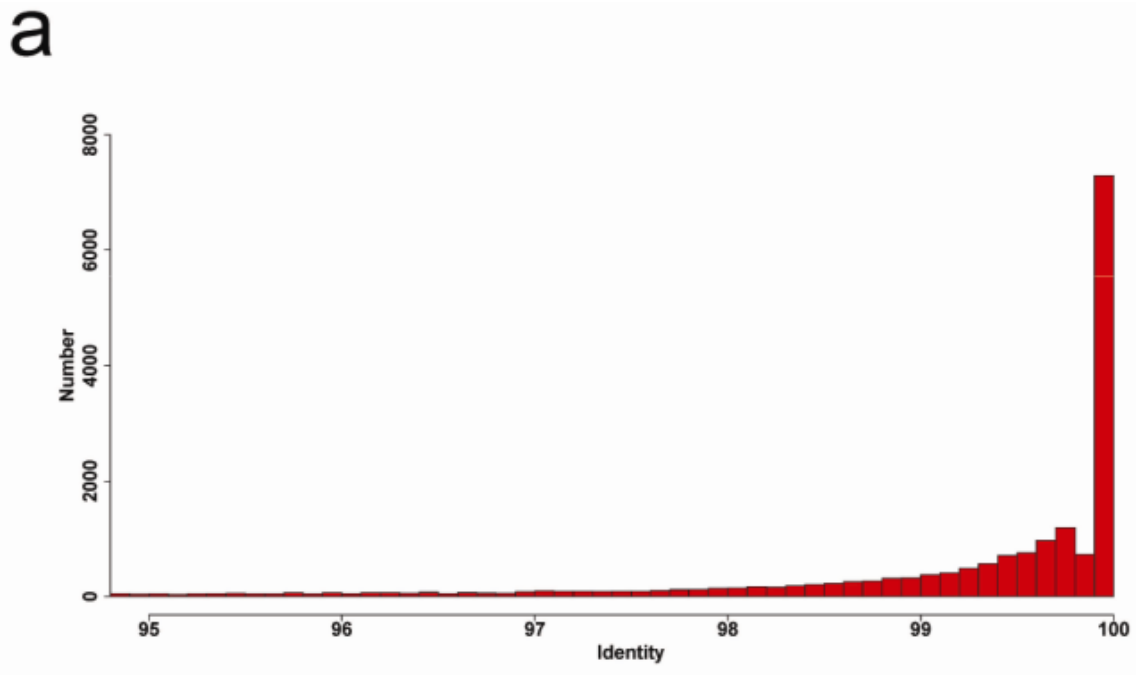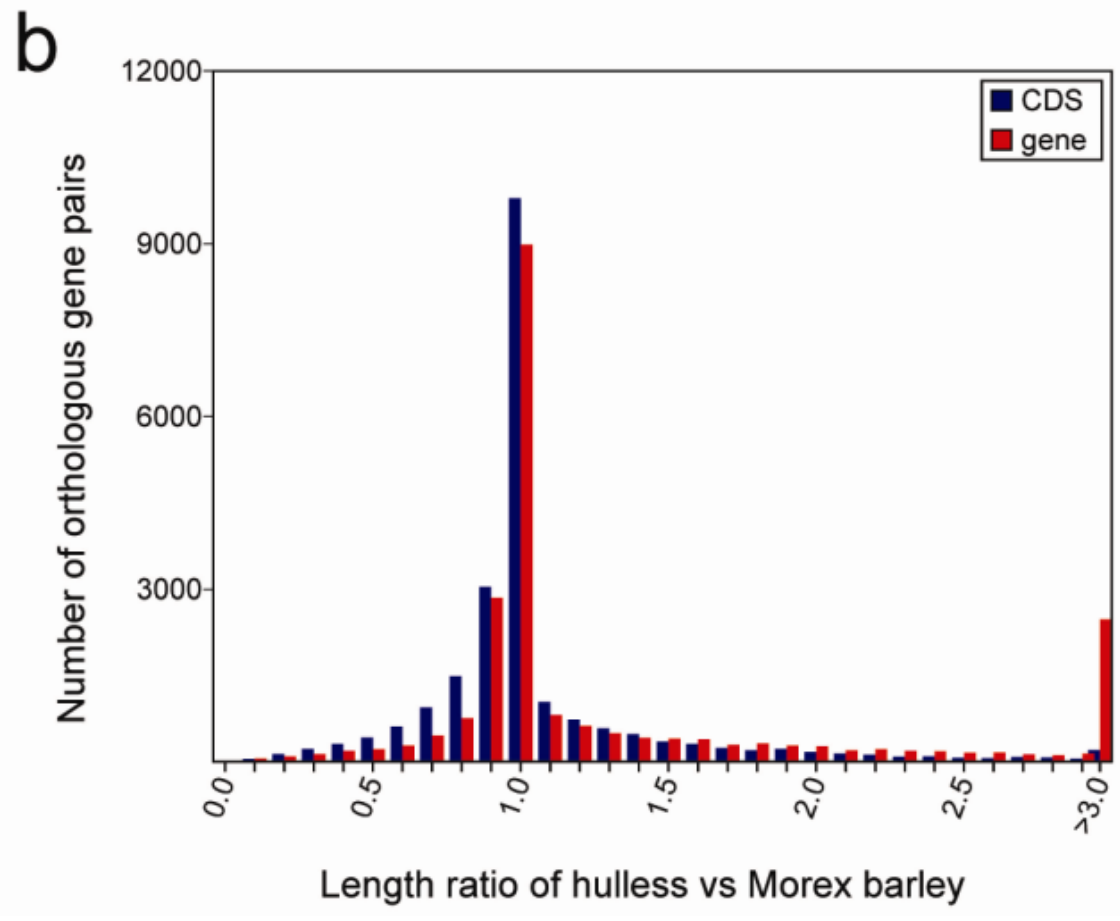

**Fig. S8, Comparison between the genes of Tibetan hulless barley and Morex. a. Protein similarity distribution of 22,673 Tibetan hulless barley and Morex orthologous. 7,224**

(31.86%) gene pairs had identical aligned sequences and 17,840 (78.68%) had protein similarity higher than 95%. b, The CDS and gene body (CDS + intron) length ratio of Tibetan hulless barley versus Morex barley for their common 22,673 orthologous gene pairs. Orthologous gene pairs were identified by reciprocal best hit of *BlastP* alignments.

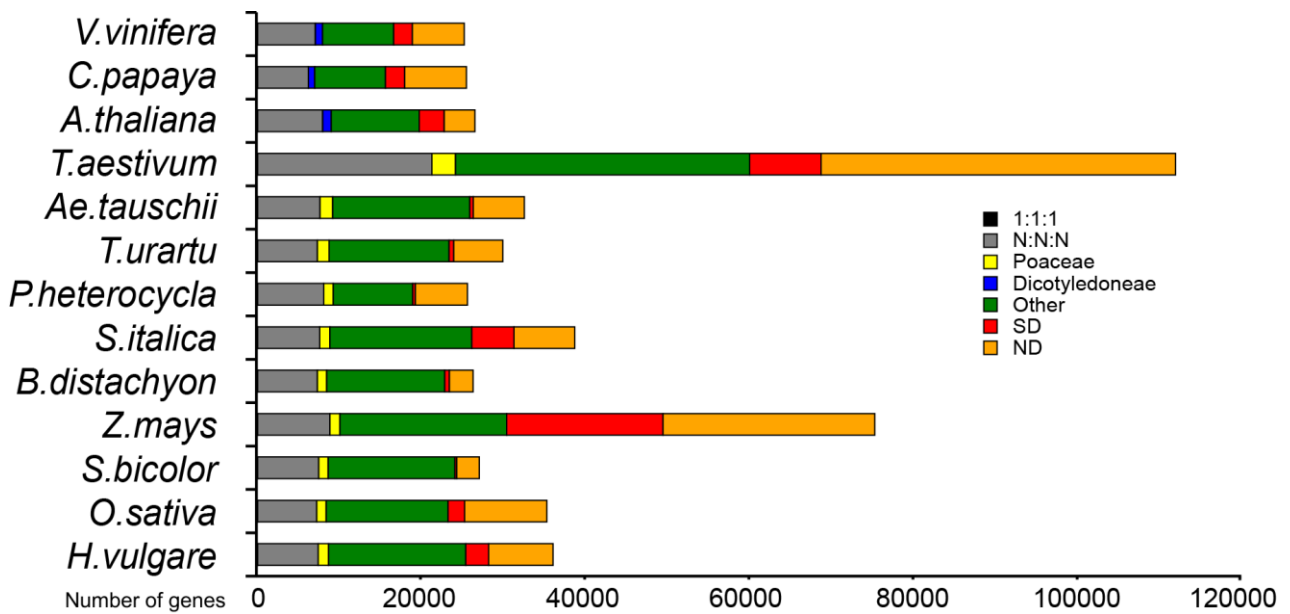

**Fig. S9, Stacked bar chart showing orthologous gene numbers among 13 plant genomes. 1:1:1, single-copy orthologs, N:N:N, multi-copy orthologs, Poaceae, Poaceae-specific orthologs, Dicotyledoneae, Dicotyledoneae-specific orthologs, SD, duplicated species-specific genes, ND, species-specific genes.**

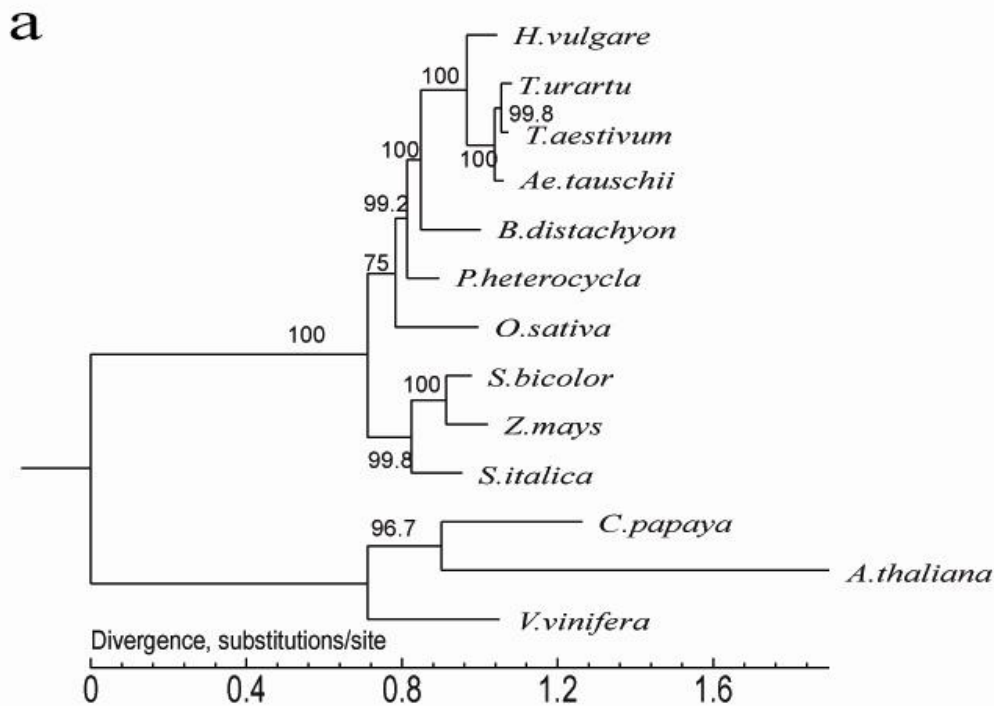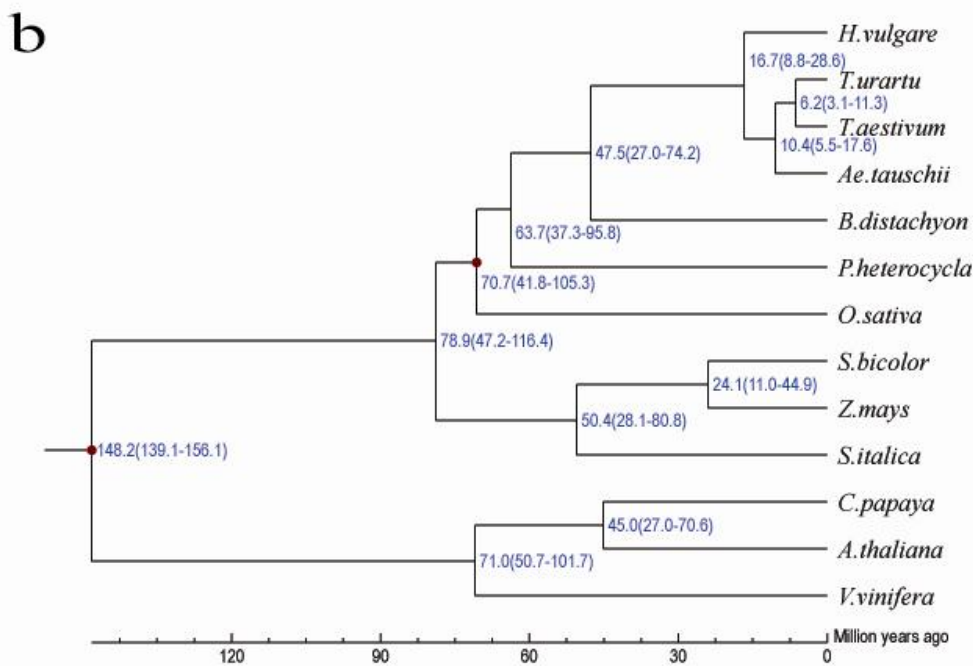

**Fig. S10, Phylogenetic tree (a) and divergence time (b) for 13 plant species. a, Phylogenetic tree constructed with orthologous genes on 4-fold degenerate sites by maximum likelihood method. Branch length represents the neutral divergence rate. b, Estimation of divergence time and substitution rate. Blue numbers on the nodes are the divergence time from present (million years ago, Mya). The calibration time *H. vulgare* – *A. thaliana* divergence (139~156 million years ago), and *H. vulgare* – *O. sativa* divergence (at least 34 million years ago) is derived from previously published papers (44, 45).**

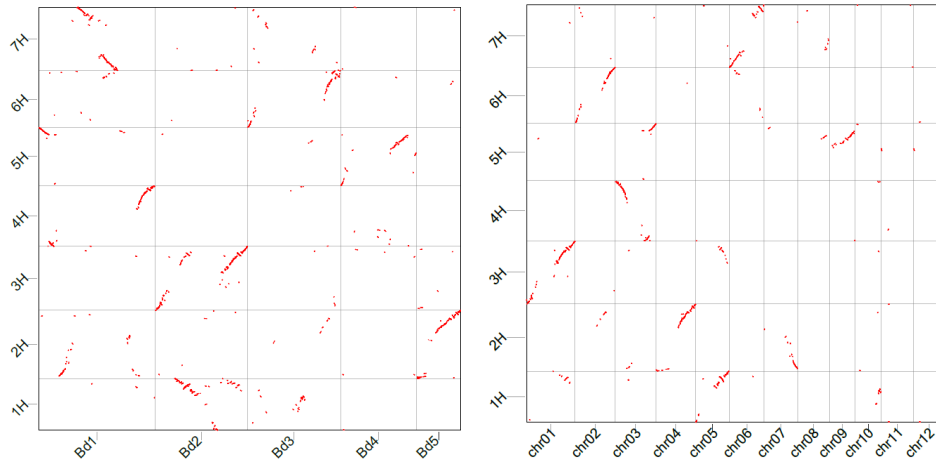

**Fig. S11, Syntenic blocks for *H. vulgare*–*B. distachyon* (left) and *H. vulgare*–*O. sativa* (right) chromosomes**

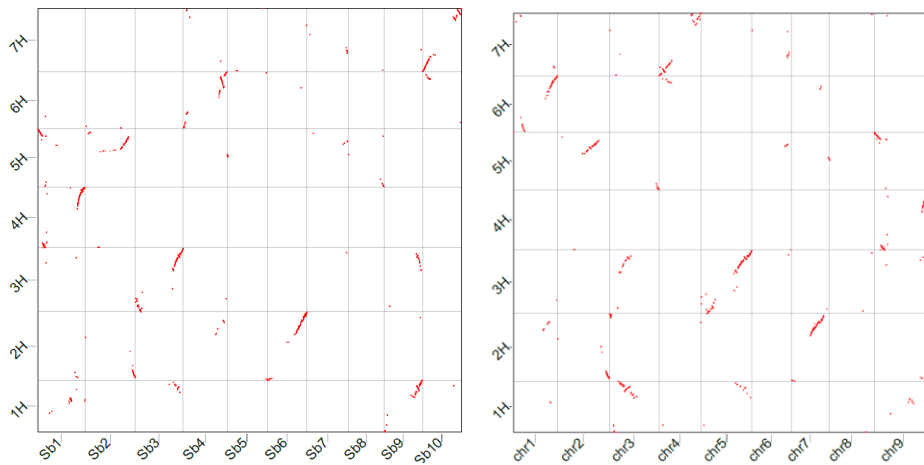

**Fig. S12, Syntenic blocks for *H. vulgare*–*S. bicolor* (left) and *H. vulgare*–*S. italic* (right) chromosomes**

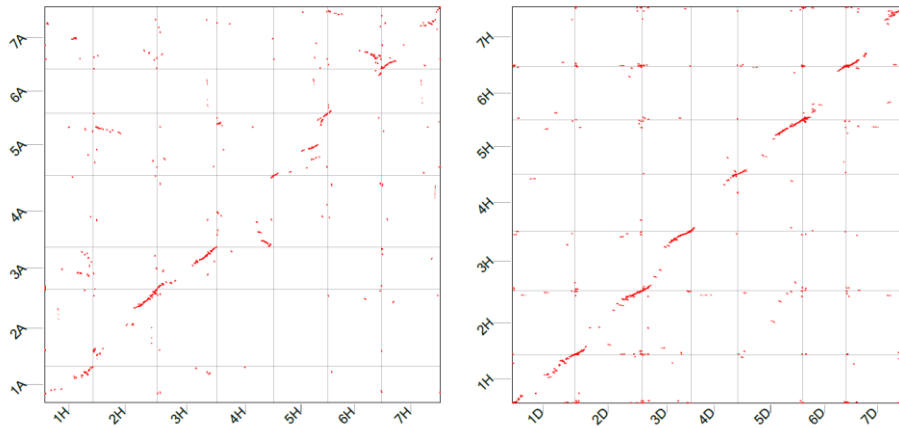

**Fig. S13, Syntenic blocks for *T. urartu*–*H. vulgare* (left) and *H. vulgare*–*A. tauschii* (right) chromosomes. Chromosomes for *H. vulgare* are named as 1H, 2H, etc. Chromosomes for *T. urartu* are named as 1A, 2A, etc. Chromosomes for *A. tauschii* are named as 1D, 2D, etc.**

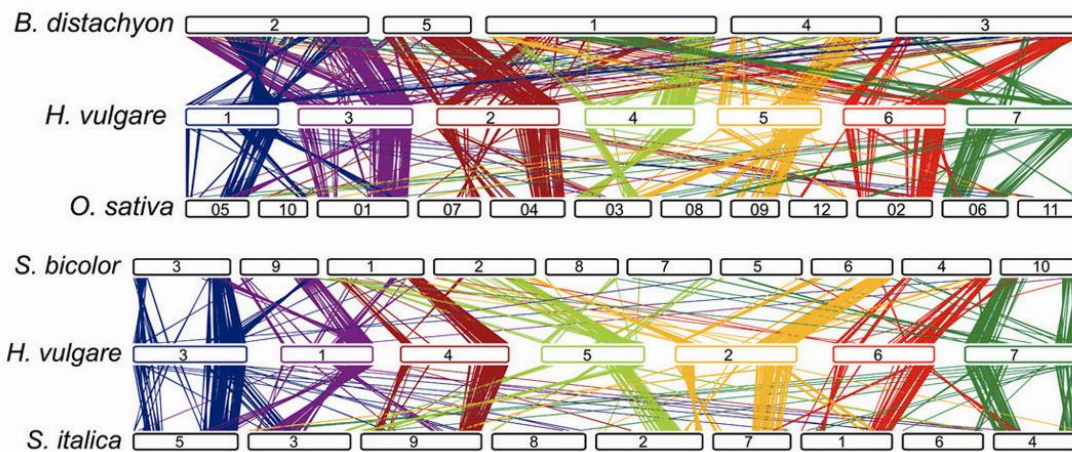

**Fig. S14, Syntenic blocks for *B. distachyon*–*H. vulgare*–*O. sativa* (up) and *S. bicolor*–*H. vulgare*–*S. italica* (down) chromosomes**



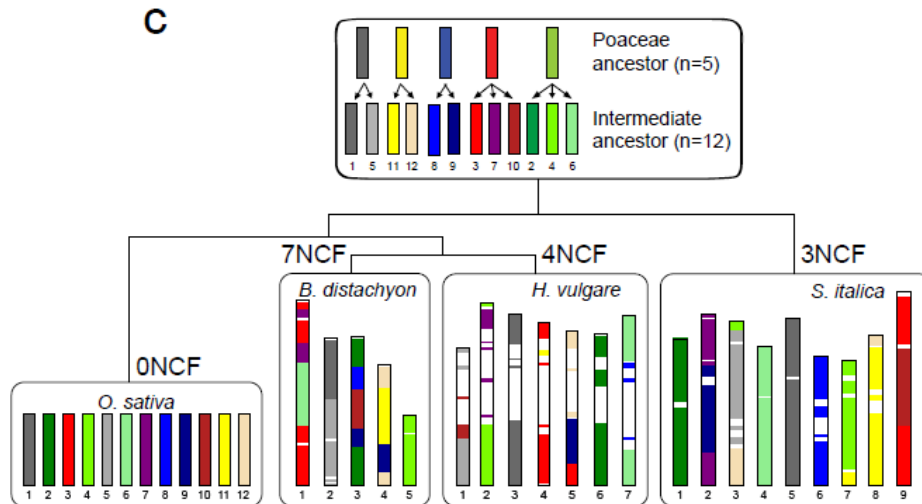

**Fig. S15, Chromosome fusion and evolution among four Poaceae species. It shows the Poaceae ancestor contains five chromosomes, then duplicates to 12 chromosomes in the intermediate ancestor. We found four main NCF for *H. vulgare* chromosomes compared to the intermediate ancestor, while 0 NCF, 7 NCF, and 3 NCF events occurred from the intermediate ancestor to generate the *O. sativa*, *B. distachyon*, and *S. italica* chromosomes. NCF represents the nested chromosome fusion event.**

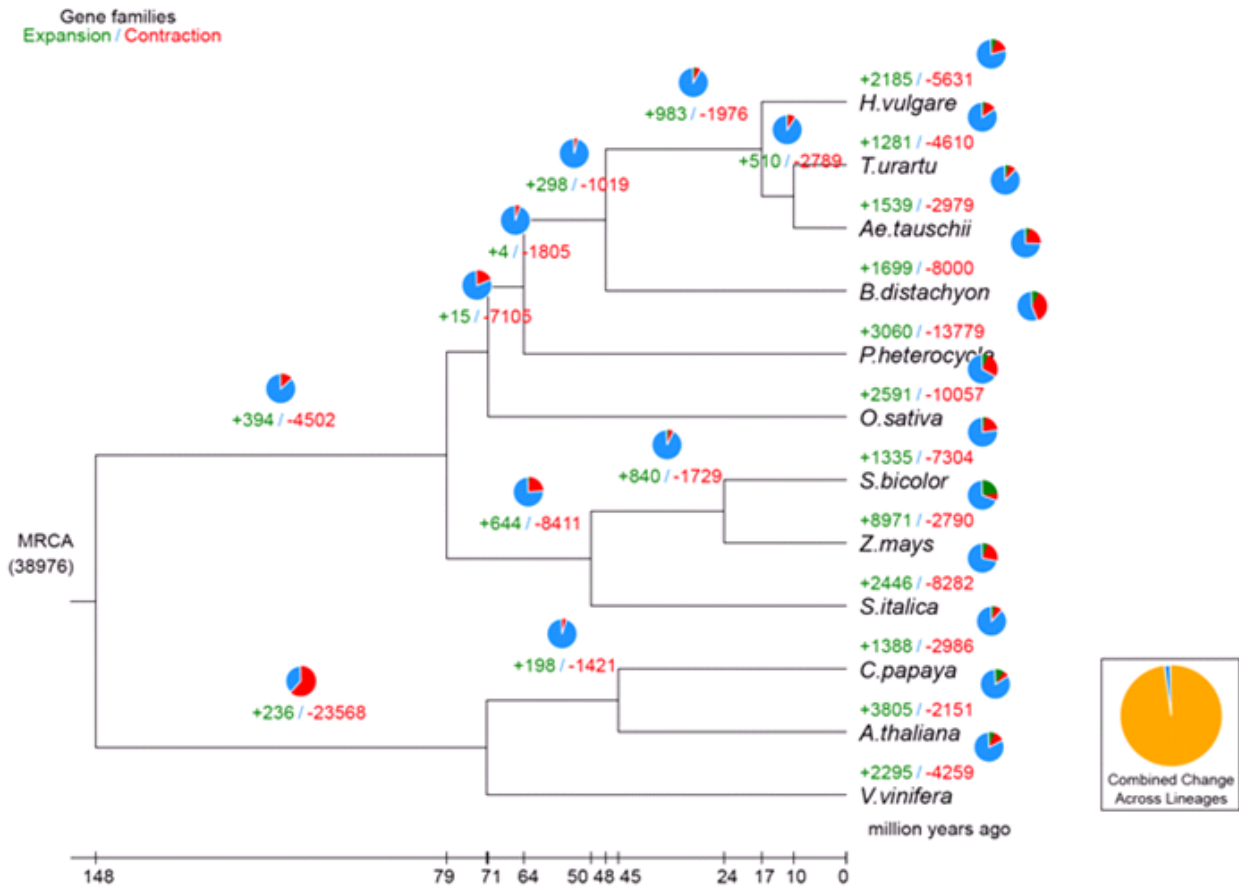

**Fig. S16, Expansion and contraction of gene families of barley compared to other plant species. Numbers below branches indicate the number of expanded (green) and contracted (red) gene families. There were 38,976 gene families involved in the analysis, which is shown as MRCA (most recent common ancestor).**

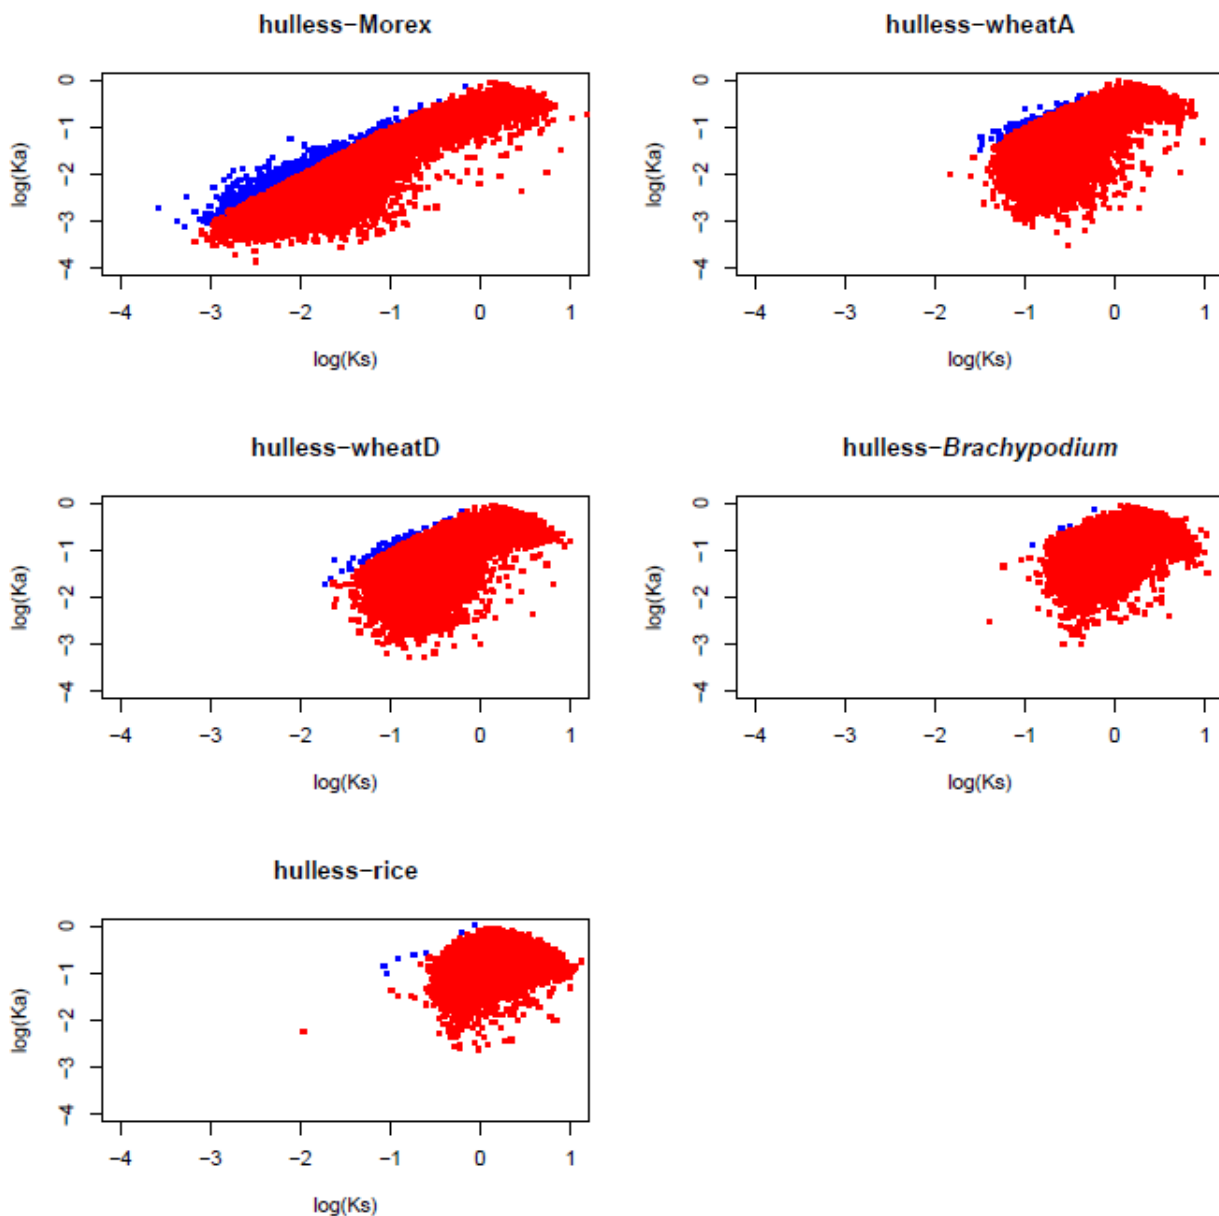

**Fig. S17, Ka-vs-Ks dot plot distribution for *H. vulgare* L. var. *nudum* – *H. vulgare* L. cv. Morex gene pairs and *H. vulgare* L. var. *nudum* – *B. distachyon*, *T. urartu*, *A. tauschii*, *O. sativa* orthologous gene pairs. hulless, Morex, wheatA, wheatD, *Brachypodium*, rice represents *H. vulgare* L. var. *nudum*, *H. vulgare* L. cv. Morex, *T. urartu*, *A. tauschii*, *B. distachyon*, and *O. sativa*, respectively.**

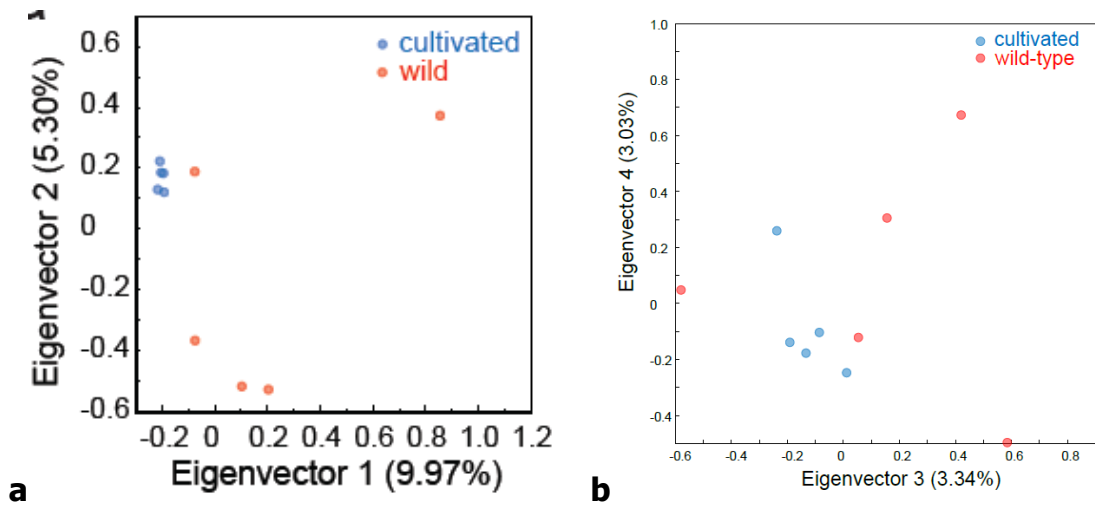

**Fig. S18, The 1<sup>st</sup>, 2<sup>nd</sup> (a), 3<sup>rd</sup>, and 4<sup>th</sup> (b) elements of PCA analysis for 10 Tibetan hulless barley individuals including five wild type and five cultivated barleys.**

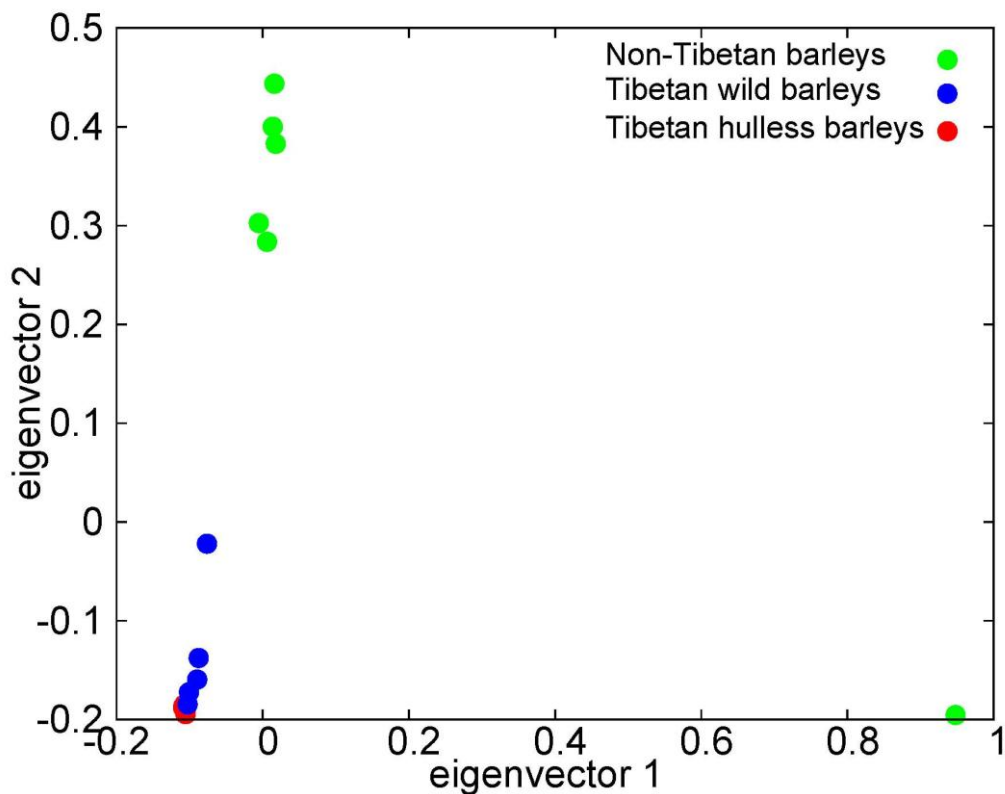

**Fig. S19. The first and second eigenvectors of the PCA analysis of barleys. The green circles indicate Non-Tibetan barleys. The blue circles indicate Tibetan wild barleys. The red circles indicate Tibetan hulless barleys.**

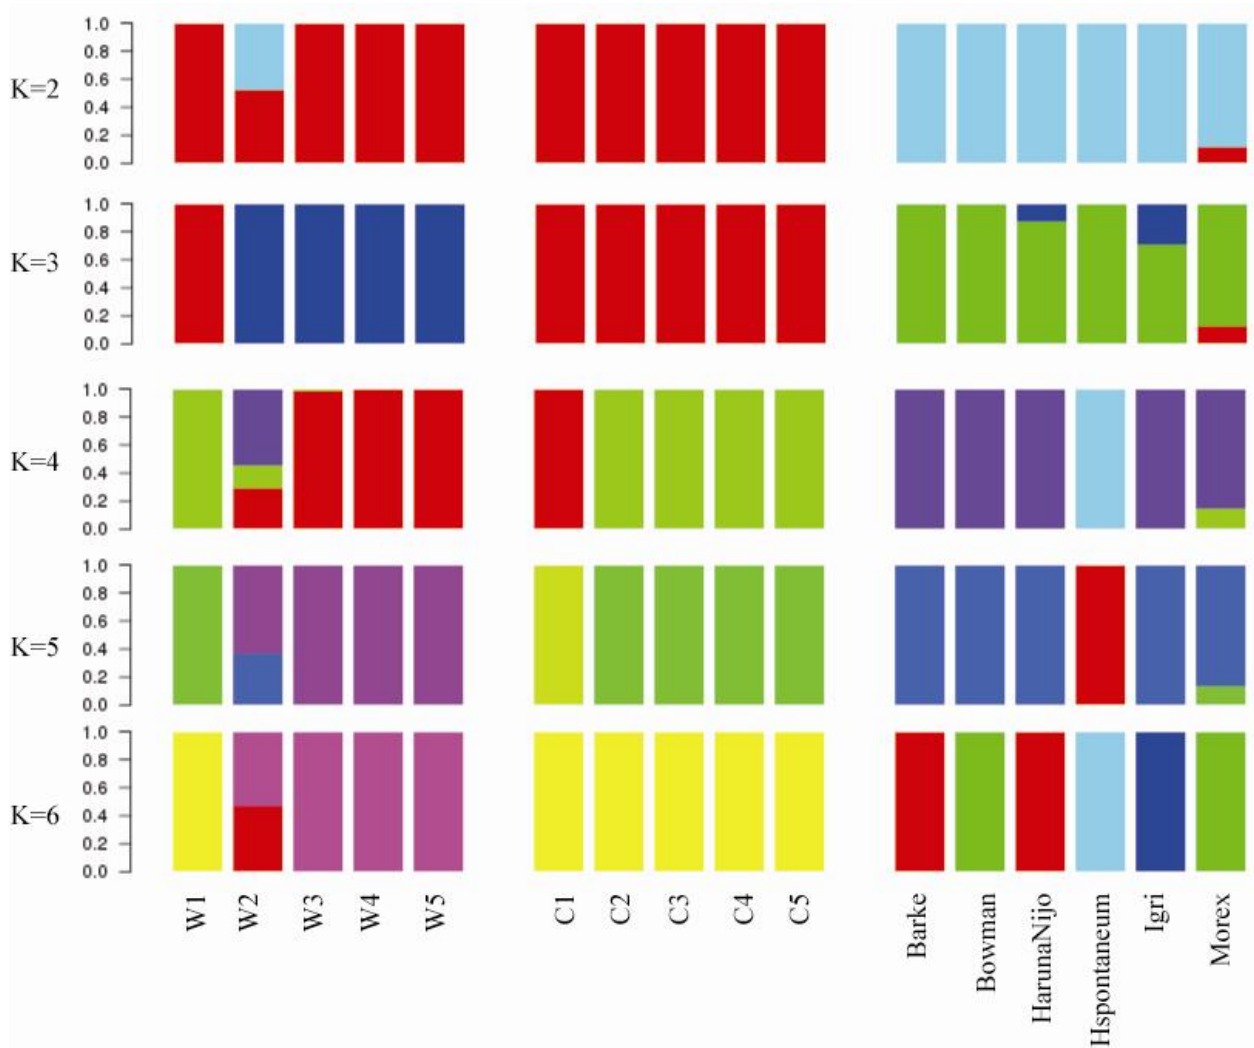

**Fig. S20. The population structure analysis of barleys. Each color denotes one population in the population structure analysis. Each vertical bar represents one accession in which the percentages of contribution from the ancestral populations are indicated by the lengths of colored segments. The number of clusters (K) was set from 2 to 6.**

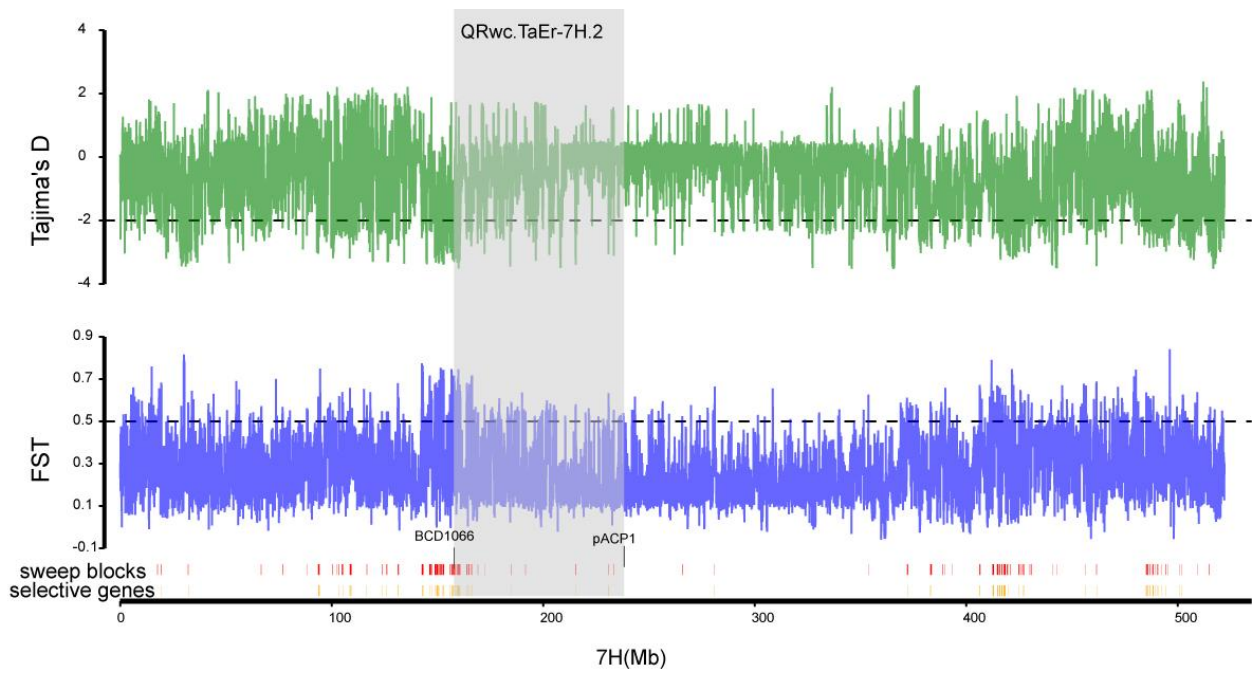

**Fig. S21.** The selective sweep of 7H chromosome. Tajima's D, Fst, sweep blocks and selective genes were shown from top to bottom. The QTL of QRwc.TaEr-7H.2 was shown in grey background with the highlighted flanking marker BCD1066 and pACP1.
